# Supplementary material for: Unusual single crystal to single crystal phase transition of a nicotine salt monitored using temperature dependent single crystal X-ray diffraction
Source: Royal Society of Chemistry journal article supplement (doi:10.1039/d3ce00042g), 2023-01-01
Supplement: d3ce00042g1.pdf [file d3ce00042g1.pdf]

## COMMUNICATION

---

# Supporting Information for Unusual Single Crystal to Single Crystal Phase Transition of a Nicotine Salt Monitored Using Temperature Dependent Single Crystal X-ray Diffraction

Devin J. Angevine, Travis B. Mitchell, Xiaotong Zhang, & Jason B. Benedict\*

Department of Chemistry, University at Buffalo, Natural Sciences Complex, Buffalo, 14260-3000, USA

---

*Supporting Information***Table of Contents**

|                                                                                                                |    |
|----------------------------------------------------------------------------------------------------------------|----|
| <i>Methods &amp; Materials</i> .....                                                                           | 1  |
| <b>Materials</b> .....                                                                                         | 1  |
| <b>Salt Synthesis</b> .....                                                                                    | 1  |
| <b>Single Crystal X-Ray Diffraction (SC-XRD)</b> .....                                                         | 1  |
| <b>Stepwise Thermal Ramping X-Ray Diffraction Batch Indexing</b> .....                                         | 2  |
| <b>Infrared (IR) Spectroscopy</b> .....                                                                        | 2  |
| <b>Powder X-Ray Diffraction (PXRD)</b> .....                                                                   | 2  |
| <b>Hirshfeld Surface Analysis</b> .....                                                                        | 2  |
| <i>Crystallographic Information</i> .....                                                                      | 3  |
| <b>Structural Data Deposition</b> .....                                                                        | 3  |
| <b>(S)-Nicotinium 2,6-Dihydroxybenzoate 293 K (HT salt) Structure &amp; Crystallographic Information</b> ..... | 3  |
| <b>(S)-Nicotinium 2,6-Dihydroxybenzoate 90 K (LT salt) Structure &amp; Crystallographic Information</b> .....  | 7  |
| <b>Phase Transition Images &amp; Contact Table</b> .....                                                       | 11 |
| <b>Crystal Images and Morphologies</b> .....                                                                   | 16 |
| .....                                                                                                          | 17 |
| <b>Calculated Precession Images</b> .....                                                                      | 18 |
| .....                                                                                                          | 19 |
| <b>PLATON/ADDSYM Images</b> .....                                                                              | 20 |
| <b>Hydrogen Bonding Interaction Tables</b> .....                                                               | 21 |
| <b>Powder X-Ray Diffraction (PXRD) Pattern</b> .....                                                           | 23 |
| <b>LT Salt <math>P2_1</math> vs <math>B2_1</math> Symmetry</b> .....                                           | 24 |
| <b><math>B2_1</math> Fractional Atomic Coordinates</b> .....                                                   | 26 |
| <i>Hirshfeld Surface Interaction Analysis</i> .....                                                            | 27 |
| <i>Infrared (IR) Spectroscopy</i> .....                                                                        | 35 |
| <i>Dynamic In Situ X-Ray Diffraction Batch Indexing Data</i> .....                                             | 38 |

## ***Methods & Materials***

### **Materials**

(S)-nicotine (>95%) and 2,6-dihydroxybenzoic acid (98%) were purchased from TCI and Alpha Aesar, respectively. Ethanol (USP grade; 190 proof) was purchased from Decon Laboratories Inc. n-Heptane (99%) was purchased from Fisher Scientific.

### **Salt Synthesis**

2,6-dihydroxybenzoic acid (7.7060 g, 50.0 mmol) was added into a 200 mL beaker. Ethanol (50.0 mL) was added with vigorous agitation. (S)-Nicotine (8.00 mL, 50.0 mmol) was added via micropipette in the dark to avoid degradation. The resulting solution was stirred for 30 minutes at 1,000 rpm. The solution was then stored in the dark unsealed to allow for crystal formation while the solvent slowly evaporated. Once the solvent evaporated, the crystalline product was collected via vacuum filtration, washing (3x30 mL) with n-heptane (14.9112 g, 94.27%). The yield was computed based upon the formula weight of (S)-nicotinium 2,6-dihydroxybenzoate (F.W. 316.4 g/mol).

### **Single Crystal X-Ray Diffraction (SC-XRD)**

X-ray diffraction data was collected using a Bruker SMART APEX-II CCD diffractometer installed at a rotating anode source (MoK $\alpha$  radiation,  $\lambda = 0.71073 \text{ \AA}$ ) and equipped with an Oxford Cryosystems (Cryostream700) nitrogen gas-flow apparatus. Five sets of data (360 frames each) were collected by the rotation method with  $0.5^\circ$  frame-width ( $\omega$  scans) with a 2.0 second exposure time for the single crystalline sample at  $2\theta = -30^\circ$ . The sample was initially run at 293 K, then again at 90 K. Using Olex2, the structure was solved with intrinsic phasing via the ShelXT structure solution program and refined with the ShelXL software suite using least squares minimization.<sup>25-27</sup> A q-peak (0.33 e-/  $\text{\AA}^3$ ) was located 0.945  $\text{\AA}$  from N1 and was assigned as a proton consistent with charge transfer from the carboxylic acid of the salt former. The atomic coordinates of H atoms attached to heteroatoms were freely refined with thermal parameters constrained to be  $U_{\text{iso}}(\text{H}) = 1.5U_{\text{eq}}(\text{N})$  or  $1.5U_{\text{eq}}(\text{O})$ . H atoms connected to carbon atoms were placed geometrically (C-H = 0.95  $\text{\AA}$ ) and refined with thermal parameters constrained to be  $U_{\text{iso}}(\text{H}) = 1.2U_{\text{eq}}(\text{C})$ . Images of the structures were created using Olex2 and the CSD: Mercury Visualization and Analysis of Crystal Structures software suite.<sup>28</sup> Absolute configuration was assigned based upon the stereochemistry of the API (S)-nicotine. The Flack parameter was removed in accordance with IUCr standards for reporting a structure in which the absolute configuration is assigned based upon a known reference molecule, which in this structure is (S)-nicotinium.

## Stepwise Thermal Ramping X-Ray Diffraction Batch Indexing

X-ray diffraction data was collected using a Bruker SMART APEX-II CCD diffractometer installed at a rotating anode source (MoK $\alpha$  radiation,  $\lambda = 0.71073 \text{ \AA}$ ) and equipped with an Oxford Cryosystems (Cryostream700) nitrogen gas-flow apparatus. Data was collected by the rotation method with  $0.5^\circ$  frame-width ( $\omega$  scans) with a 2.0 second exposure time for the single crystalline sample at  $2\theta = -30^\circ$ . The nature and reversibility of the phase transition between the low high temperature salt (**HT salt**) and its corresponding low temperature salt (**LT salt**) was determined using python scripts which automate routines within the APEX4 framework including all of the processes necessary to determine the unit cell for a set of frames: harvesting reflections, indexing using difference vectors and fast Fourier transform indexing methods, unit cell refinements, and assigning the unit cell to a Bravais lattice.<sup>29</sup> The Bravais lattice for this system was predetermined and set to monoclinic *P* since the **HT salt** and the **LT salt** were determined to have  $P2_1$  symmetry. Unit cells obtained using this method enable the monitoring of changes in real time while utilizing temperature as an external stimulus. Each unit cell (or batch) was indexed using 20 frames per batch. The initial temperature was calibrated and set to 110 K. The temperature was decreased in a stepwise fashion by increments of 1 K every ten batches (200 frames) until 95 K was reached and similarly increased back to 110 K. The entire data collection yielded a total of 310 indexed batches. In the event of tied or very similar indexing scores, the corresponding batch was independently indexed.

## Infrared (IR) Spectroscopy

Infrared spectral analysis was carried out on a Perkin Elmer Spectrum Two FTIR spectrometer equipped with an attenuated total reflectance (ATR) module. Eight scans were averaged for each spectrum.

## Powder X-Ray Diffraction (PXRD)

Powder X-ray diffraction data was collected using a Rigaku Ultima IV X-ray Diffraction (XRD) System equipped with standard attachment (CuK $\alpha$  radiation,  $\lambda = 1.54 \text{ \AA}$ ). Data collection was done over the  $2\theta$  range from  $2^\circ$  to  $45^\circ$  utilizing a  $0.02^\circ$  incremental step. A scanning speed of  $5^\circ$  per minute was utilized. Slit heights were set as follows: divergence slit:  $2/3^\circ$ ; divergence height limiting slit: 10mm; scattering slit:  $2/3^\circ$ ; receiving slit: 0.3mm. PXRD patterns were simulated using the Mercury 4.0 2021.2.0 visualization and analysis of crystal structures software suite.<sup>26</sup> A  $0.02^\circ$  step was utilized for the simulated PXRD pattern along with a full width half max of 0.1. All PXRD patterns were normalized to a maximum intensity of 10,000 counts.

## Hirshfeld Surface Analysis

The Hirshfeld surfaces of the molecules in the **HT salt** structure and **LT salt** structure were generated using *Crystal Explorer 17.5*.<sup>30</sup> For all salts the  $d_{\text{norm}}$  surface was mapped using the color scale with the range  $-0.050$  a.u. (red) to  $0.600$  a.u. (blue). In addition, 2-D fingerprint plots were generated as the outer nuclei ( $d_e$ ) versus the inner nuclei ( $d_i$ ) using an expanded interaction distance ranging from  $0.6 \text{ \AA}$  to  $2.8 \text{ \AA}$ .

## *Crystallographic Information*

### **Structural Data Deposition**

Deposition number 2233083 (**HT salt**) & 2233084 (**LT salt**) contains the supplementary crystallographic data for this paper. This data is provided free of charge by the joint Cambridge Crystallographic Data Centre and Fachinformationszentrum Karlsruhe Access Structures service [www.ccdc.cam.ac.uk/structures](http://www.ccdc.cam.ac.uk/structures).

### **(S)-Nicotinium 2,6-Dihydroxybenzoate 293 K (HT salt) Structure & Crystallographic Information**

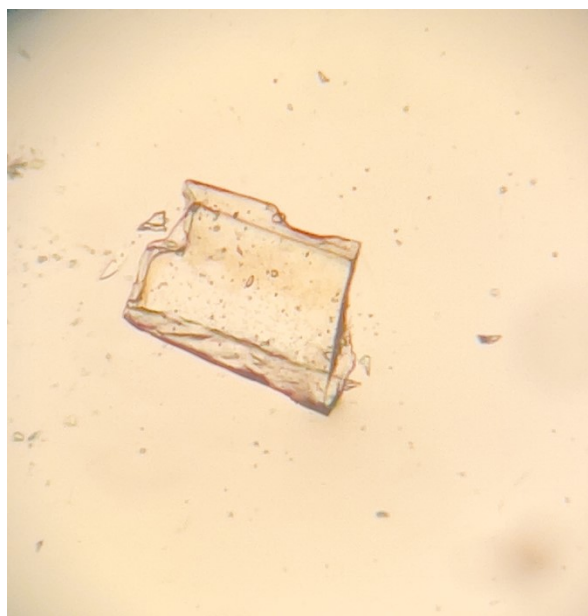

**Figure S1:** A crystal of **HT Salt**.

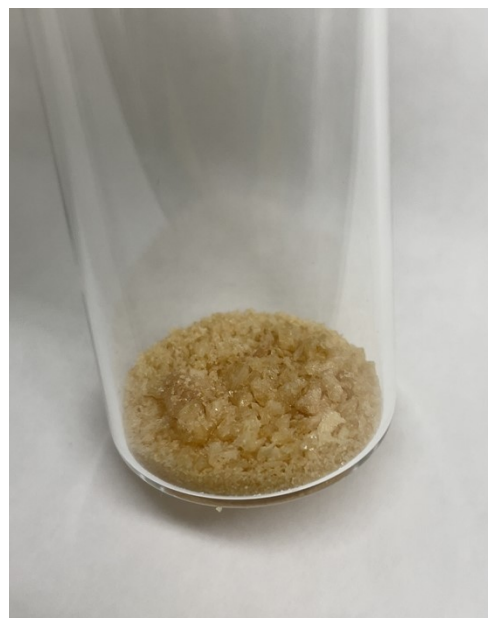

**Figure S2:** A vial of crystals of **HT Salt**.

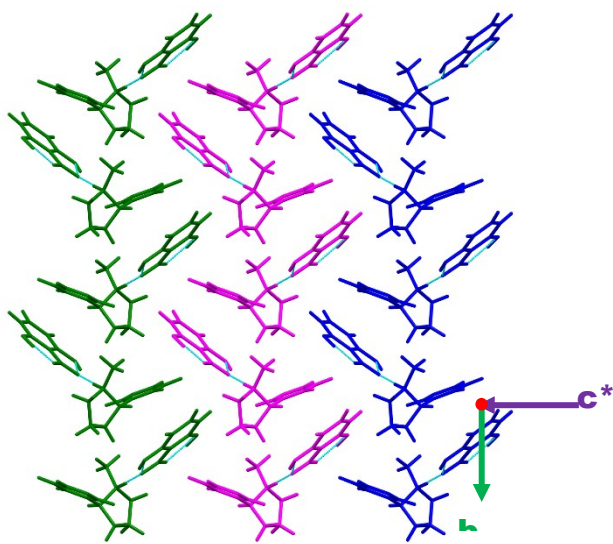

**Figure S3:** Packing diagram viewed along [100] of HT salt depicting columns parallel to [010] and stacking of these columns along [001].

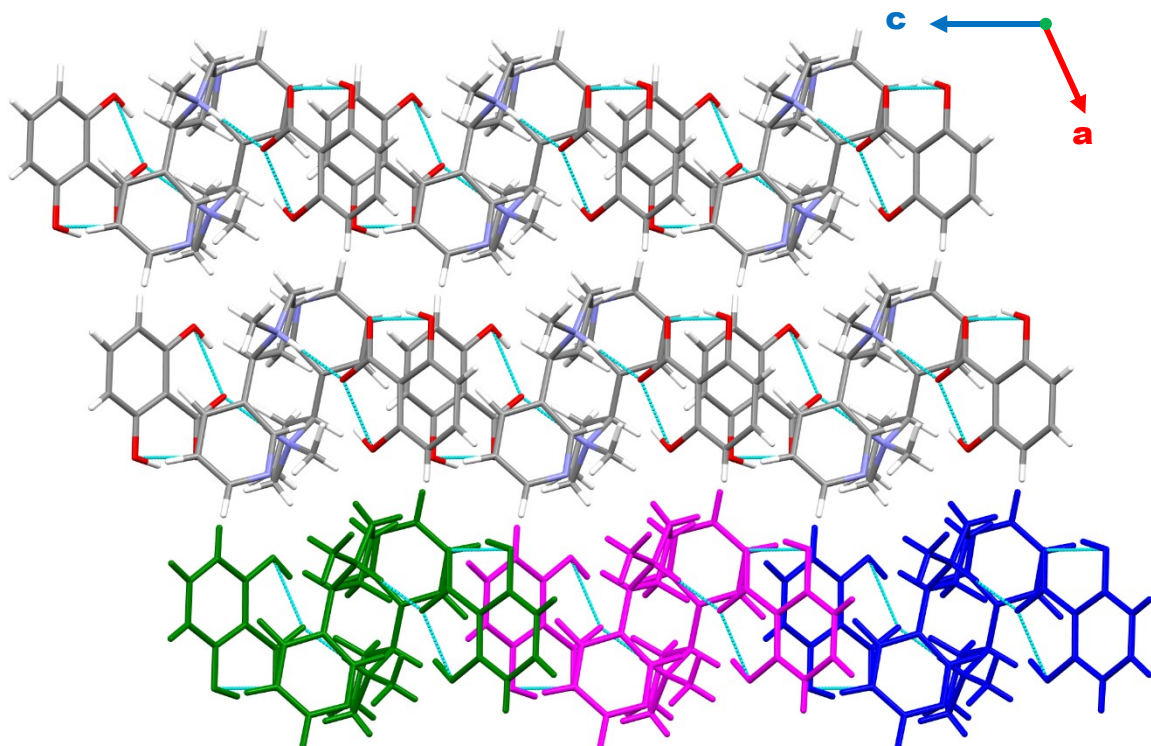

**Figure S4:** Packing diagram viewed down [010] of HT salt depicting intercalated sheets parallel to [001] and stacking of sheets along [100].

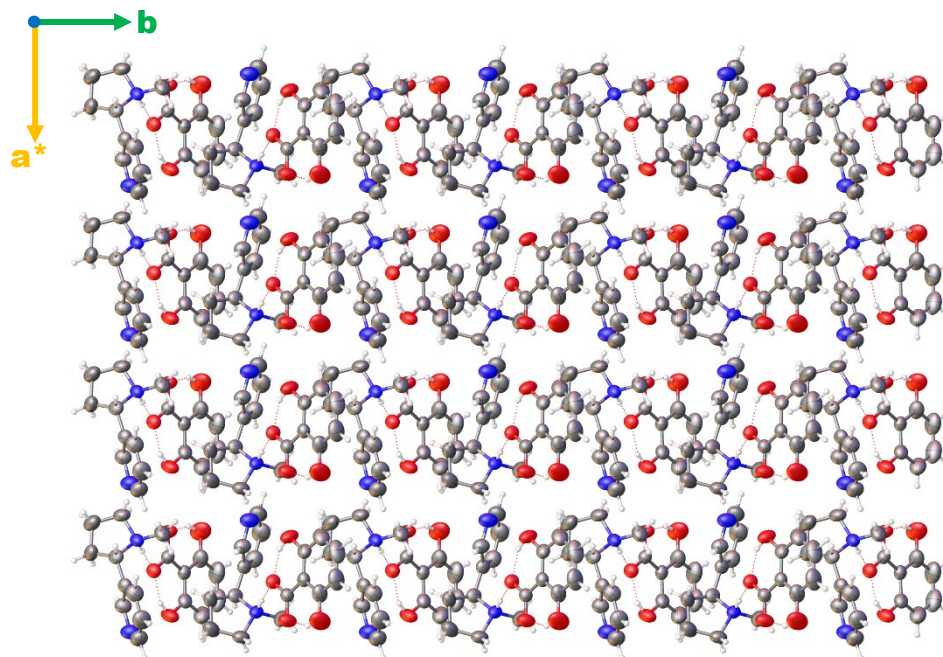

**Figure S5:** Packing diagram viewed down [001] of HT salt with the  $b$ -axis and  $a^*$ -axis normal to the plane. Atom colors: oxygen (red), nitrogen (blue), carbon (grey), hydrogen (white). Hydrogen bond interactions are highlighted in red dashed lines.

**Table S1:** Crystallographic details of (S)-nicotinium 2,6-dihydroxybenzoate at 293 K (**HT salt**).

|                                                   |                                                               |
|---------------------------------------------------|---------------------------------------------------------------|
| <b>Identification code</b>                        | HT_Salt                                                       |
| <b>Empirical formula</b>                          | C <sub>17</sub> H <sub>20</sub> N <sub>2</sub> O <sub>4</sub> |
| <b>Formula weight</b>                             | 316.35                                                        |
| <b>Temperature/K</b>                              | 293.00                                                        |
| <b>Crystal system</b>                             | monoclinic                                                    |
| <b>Space group</b>                                | P2 <sub>1</sub>                                               |
| <b>a/Å</b>                                        | 7.7196(5)                                                     |
| <b>b/Å</b>                                        | 11.7045(7)                                                    |
| <b>c/Å</b>                                        | 9.4241(6)                                                     |
| <b>α/°</b>                                        | 90                                                            |
| <b>β/°</b>                                        | 108.980(2)                                                    |
| <b>γ/°</b>                                        | 90                                                            |
| <b>Volume/Å<sup>3</sup></b>                       | 805.21(9)                                                     |
| <b>Z</b>                                          | 2                                                             |
| <b>ρ<sub>calc</sub>/g/cm<sup>3</sup></b>          | 1.305                                                         |
| <b>μ/mm<sup>-1</sup></b>                          | 0.094                                                         |
| <b>F(000)</b>                                     | 336.0                                                         |
| <b>Crystal size/mm<sup>3</sup></b>                | 0.22 × 0.15 × 0.06                                            |
| <b>Radiation</b>                                  | MoKα (λ = 0.71073)                                            |
| <b>2θ range for data collection/°</b>             | 4.57 to 56.824                                                |
| <b>Index ranges</b>                               | -10 ≤ h ≤ 10, -15 ≤ k ≤ 15, -12 ≤ l ≤ 12                      |
| <b>Reflections collected</b>                      | 16130                                                         |
| <b>Independent reflections</b>                    | 4019 [R <sub>int</sub> = 0.0290, R <sub>sigma</sub> = 0.0248] |
| <b>Data/restraints/parameters</b>                 | 4019/1/218                                                    |
| <b>Goodness-of-fit on F<sup>2</sup></b>           | 1.045                                                         |
| <b>Final R indexes [I ≥ 2σ (I)]</b>               | R <sub>1</sub> = 0.0408, wR <sub>2</sub> = 0.1008             |
| <b>Final R indexes [all data]</b>                 | R <sub>1</sub> = 0.0572, wR <sub>2</sub> = 0.1107             |
| <b>Largest diff. peak/hole / e Å<sup>-3</sup></b> | 0.11/-0.13                                                    |



**(S)-Nicotinium 2,6-Dihydroxybenzoate 90 K (LT salt) Structure & Crystallographic Information**

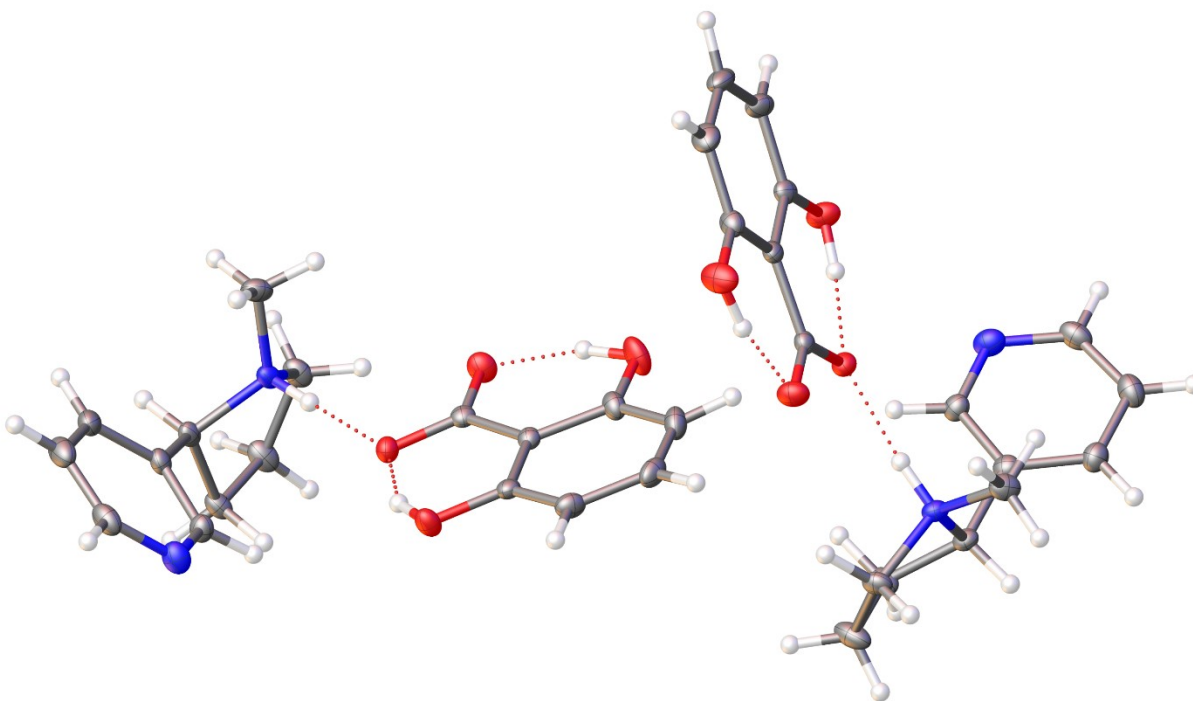

**Figure S6:** Asymmetric unit of **LT salt**. Atom colors: oxygen (red), nitrogen (blue), carbon (grey), hydrogen (white). Hydrogen bond interactions are highlighted in red dashed lines.

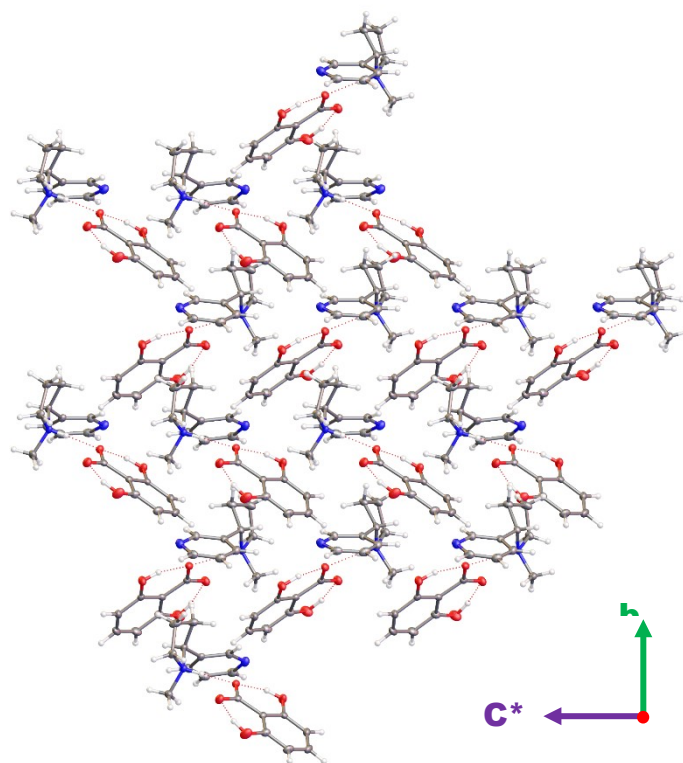

**Figure S7:** Packing diagram viewed down crystallographic *a*-axis of **LT salt** with *b* and *c\** normal to the plane. Atom colors: oxygen (red), nitrogen (blue), carbon (grey), hydrogen (white). Hydrogen bond interactions are highlighted in red dashed lines.

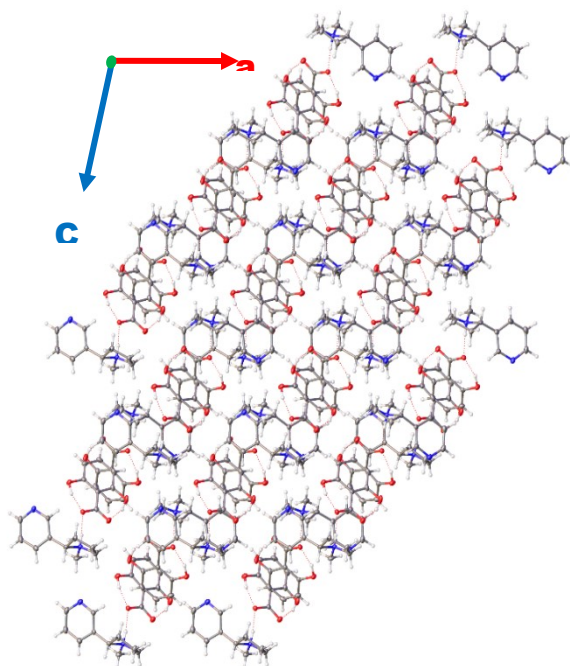

**Figure S8:** Packing diagram viewed down crystallographic *b*-axis of **LT salt** with *a* and *c* normal to the plane. Atom colors: oxygen (red), nitrogen (blue), carbon (grey), hydrogen (white). Hydrogen bond interactions are highlighted in red dashed lines.

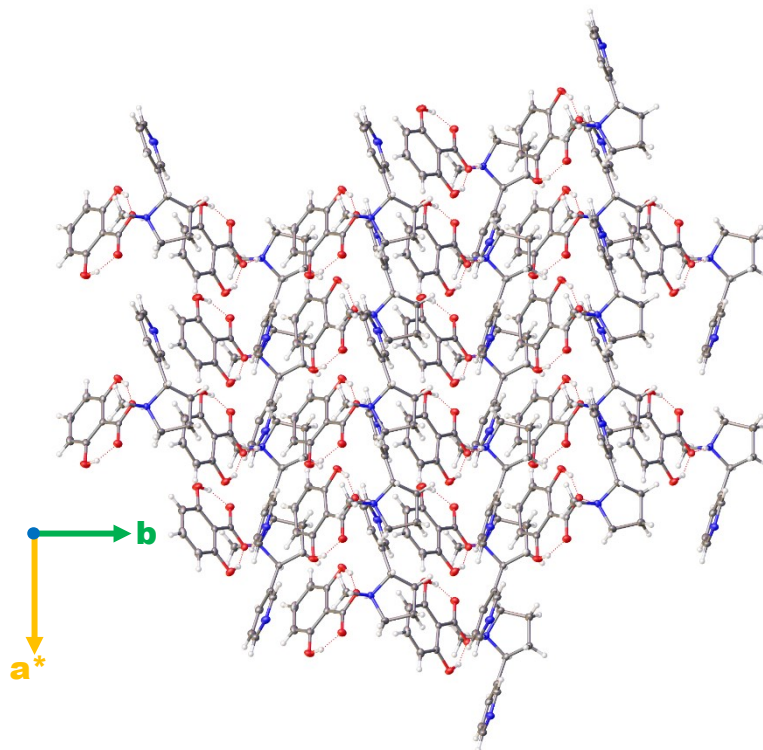

**Figure S8:** Packing diagram viewed down crystallographic  $c$ -axis of **LT salt** with the  $b$ -axis and  $a^*$ -axis normal to the plane. Atom colors: oxygen (red), nitrogen (blue), carbon (grey), hydrogen (white). Hydrogen bond interactions are highlighted in red dashed lines.

**Table S2:** Crystallographic details of (S)-nicotinium 2,6-dihydroxybenzoate at 90 K (LT salt).

|                                                   |                                                               |
|---------------------------------------------------|---------------------------------------------------------------|
| <b>Identification code</b>                        | <b>LT_Salt</b>                                                |
| <b>Empirical formula</b>                          | C <sub>17</sub> H <sub>20</sub> N <sub>2</sub> O <sub>4</sub> |
| <b>Formula weight</b>                             | 316.35                                                        |
| <b>Temperature/K</b>                              | 90                                                            |
| <b>Crystal system</b>                             | monoclinic                                                    |
| <b>Space group</b>                                | P2 <sub>1</sub>                                               |
| <b>a/Å</b>                                        | 9.9691(4)                                                     |
| <b>b/Å</b>                                        | 11.5520(4)                                                    |
| <b>c/Å</b>                                        | 13.8196(5)                                                    |
| <b>α/°</b>                                        | 90                                                            |
| <b>β/°</b>                                        | 101.9950(10)                                                  |
| <b>γ/°</b>                                        | 90                                                            |
| <b>Volume/Å<sup>3</sup></b>                       | 1556.76(10)                                                   |
| <b>Z</b>                                          | 4                                                             |
| <b>ρ<sub>calc</sub>/g/cm<sup>3</sup></b>          | 1.350                                                         |
| <b>μ/mm<sup>-1</sup></b>                          | 0.097                                                         |
| <b>F(000)</b>                                     | 672.0                                                         |
| <b>Crystal size/mm<sup>3</sup></b>                | 0.22 × 0.15 × 0.06                                            |
| <b>Radiation</b>                                  | MoKα (λ = 0.71073)                                            |
| <b>2θ range for data collection/°</b>             | 4.176 to 56.732                                               |
| <b>Index ranges</b>                               | -13 ≤ h ≤ 13, -15 ≤ k ≤ 15, -18 ≤ l ≤ 18                      |
| <b>Reflections collected</b>                      | 28199                                                         |
| <b>Independent reflections</b>                    | 7777 [R <sub>int</sub> = 0.0299, R <sub>sigma</sub> = 0.0293] |
| <b>Data/restraints/parameters</b>                 | 7777/1/435                                                    |
| <b>Goodness-of-fit on F<sup>2</sup></b>           | 1.034                                                         |
| <b>Final R indexes [I ≥ 2σ (I)]</b>               | R <sub>1</sub> = 0.0335, wR <sub>2</sub> = 0.0844             |
| <b>Final R indexes [all data]</b>                 | R <sub>1</sub> = 0.0379, wR <sub>2</sub> = 0.0874             |
| <b>Largest diff. peak/hole / e Å<sup>-3</sup></b> | 0.24/-0.22                                                    |

## Phase Transition Images &amp; Contact Table

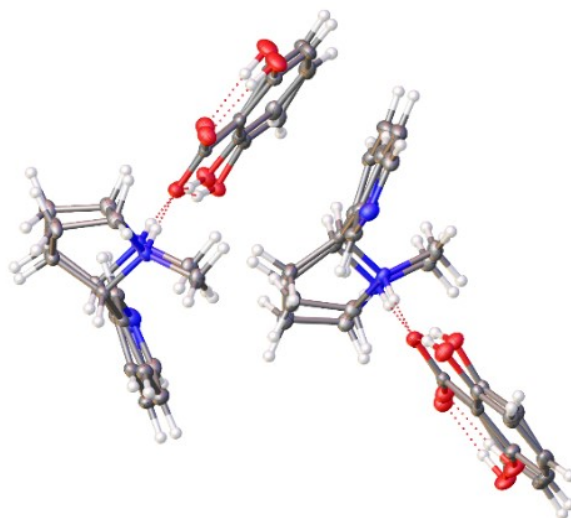

**Figure S9:** View of **LT salt** perturbation at 90 K. Atom colors: oxygen (red), nitrogen (blue), carbon (grey), hydrogen (white). Hydrogen bond interactions are highlighted in red dashed lines.

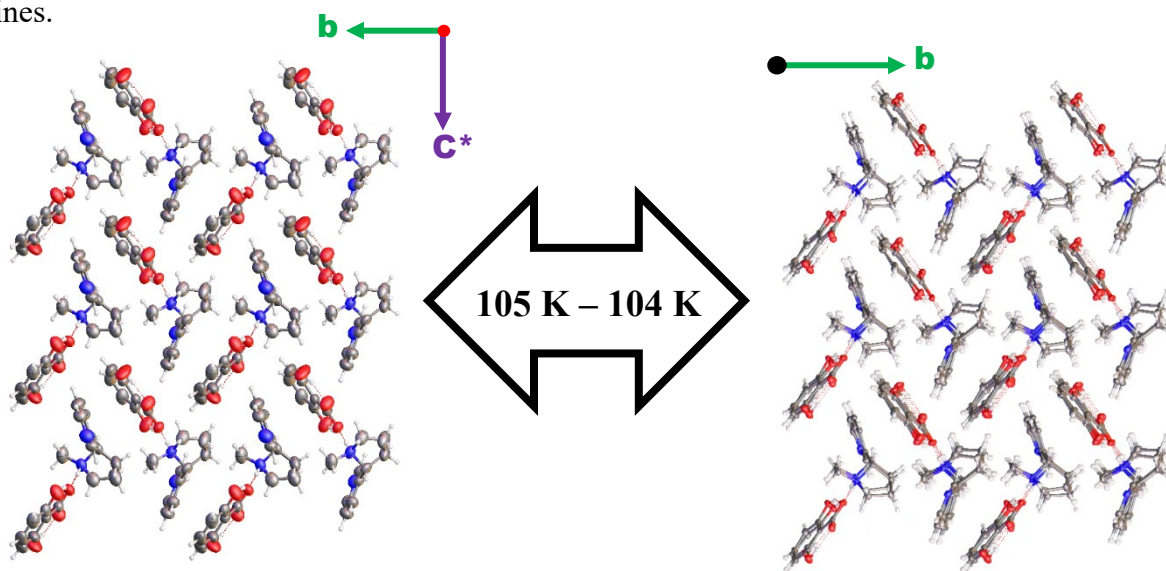

**Figure S10:** Packing diagram viewed down  $[100]$  of **HT salt** and viewed parallel to  $[101]$  of **LT salt** after undergoing a temperature induced phase transition at 105 K to 104 K. Atom colors: oxygen (red), nitrogen (blue), carbon (grey), hydrogen (white). Hydrogen bond interactions are highlighted in red dashed lines.

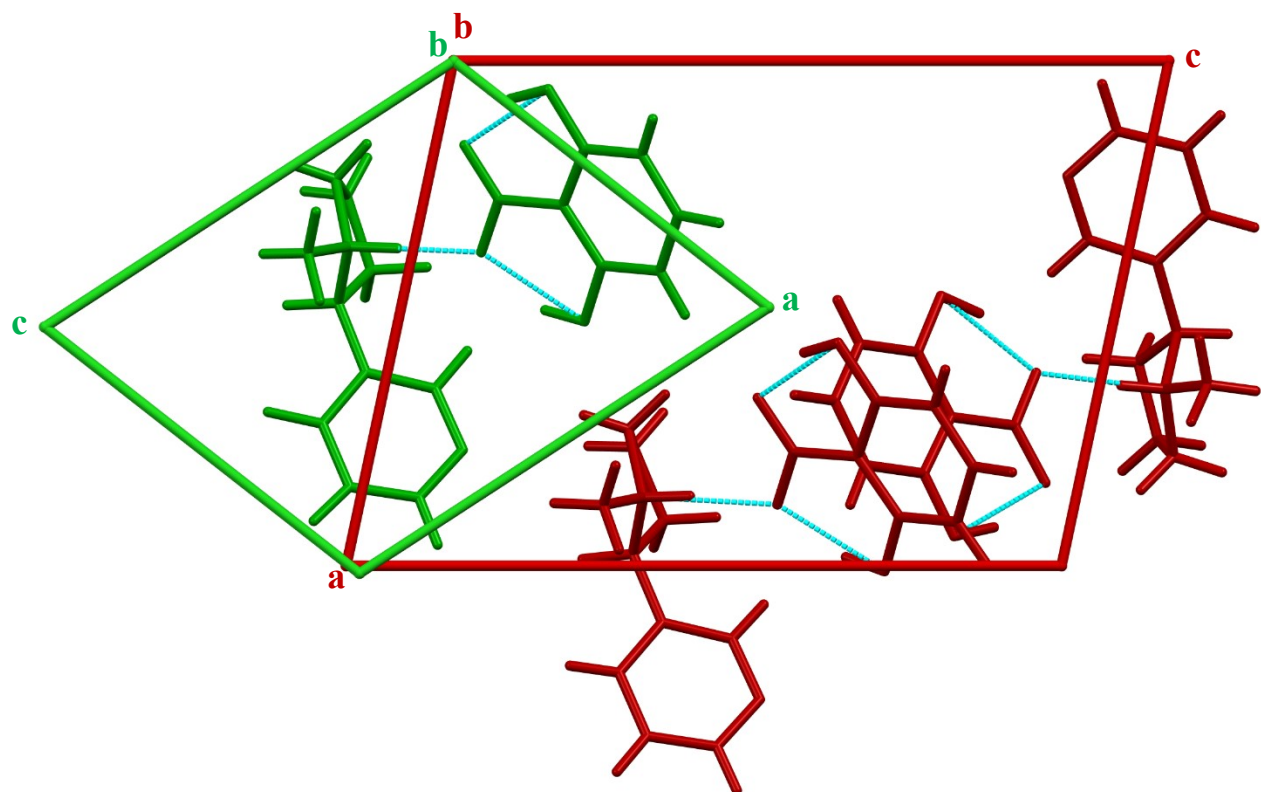

**Figure S11:** Diagram depicting the alignment of the unit cells of **HT salt** (green) and **LT salt** (red).  $[010]$ ,  $[101]$ , and  $[10\bar{1}]$  in **HT salt** correspond approximately to  $[0\bar{1}0]$ ,  $[100]$ , and  $[001]$  in **LT salt**, respectively. Hydrogen bonds highlighted in blue dashed lines.

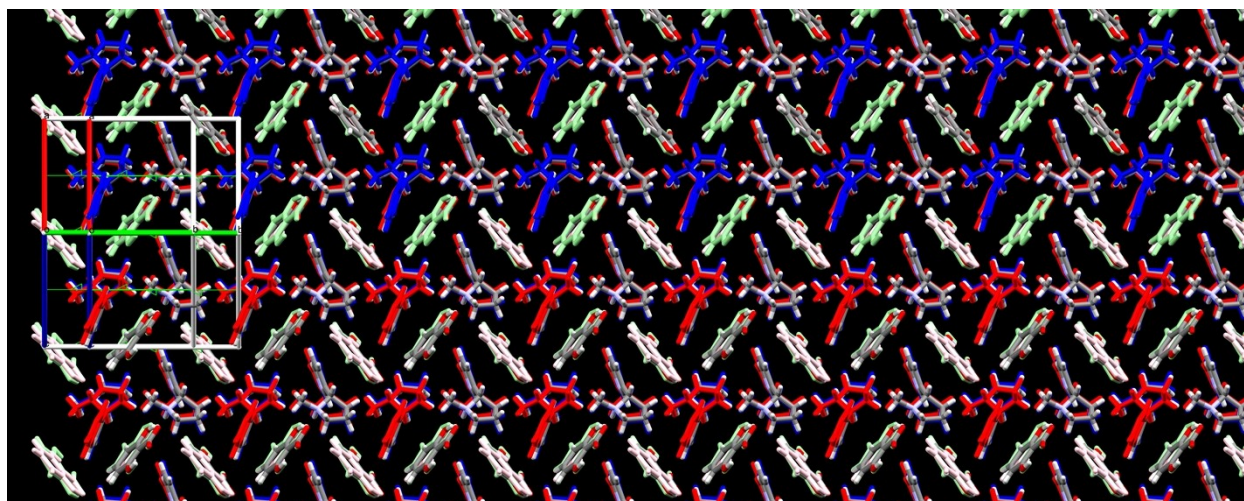

**Figure S12:** Overlaid view of the  $P2_1$  and  $B2_1$  structures showing the observable lattice shifts of the molecules in the low temperature phase transition  $P2_1$ . The vectors are aligned with  $[100]$ ,  $[010]$  and  $[001]$  being parallel between the structures and the screw axes are aligned along  $[010]$  between the structures. With respect to the  $P2_1$  structure: nicotine #1 is shown in red; nicotine #2 is shown in blue; 2,6-DHB #1 is shown in pink; 2,6-DHB #2 is shown in green. With respect to the  $B2_1$  structure: carbon atoms are shown in grey; hydrogen atoms are shown in white; oxygen atoms are shown in red; and nitrogen atoms are shown in blue. The molecule numbering scheme is found in Table S3.

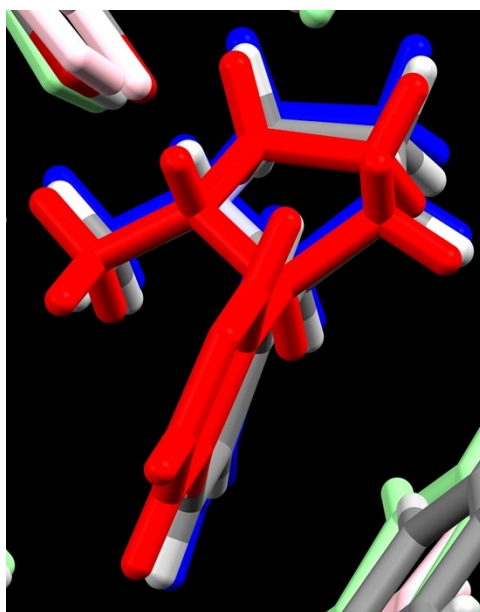

**Figure S13:** Overlaid view of the  $P2_1$  and  $B2_1$  nicotine molecules showing the observable lattice shifts of the nicotine moieties in the low temperature phase transition  $P2_1$ . With respect to the  $P2_1$  structure: nicotine #1 is shown in red and nicotine #2 is shown in blue. With respect to the  $B2_1$  structure: carbon atoms are shown in grey; hydrogen atoms are shown in white; oxygen atoms are shown in red; and nitrogen atoms are shown in blue. The molecule numbering scheme is found in Table S3.

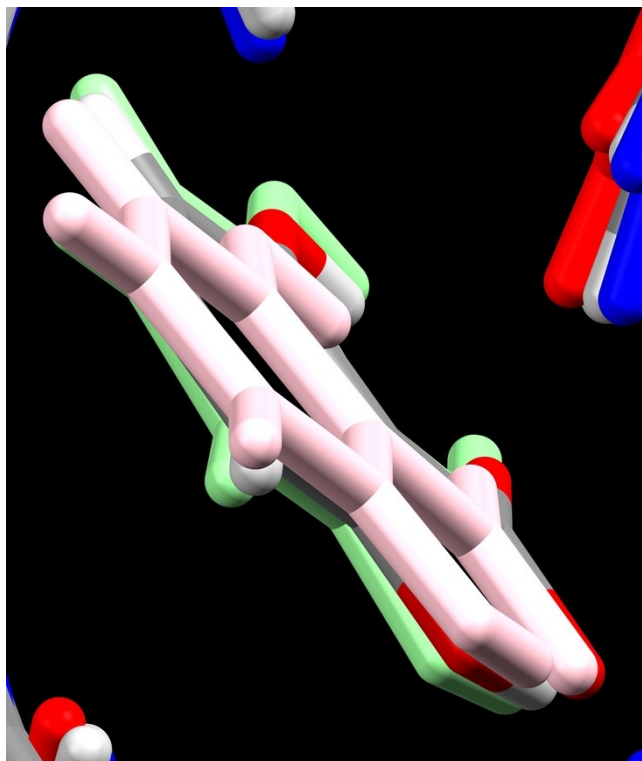

**Figure S14:** Overlaid view of the  $P2_1$  and  $B2_1$  nicotine molecules showing the observable lattice shifts of the nicotine moieties in the low temperature phase transition  $P2_1$ . With respect to the  $P2_1$  structure: 2,6-DHB #1 is shown in pink and 2,6-DHB #2 is shown in green. With respect to the  $B2_1$  structure: carbon atoms are shown in grey; hydrogen atoms are shown in white; oxygen atoms are shown in red; and nitrogen atoms are shown in blue. The molecule numbering scheme is found in Table S3.



**Table S3:** Heteroatoms and molecular numbering scheme for the **HT salt** and **LT salt** API nicotine and salt former 2,6-DHB molecules.

| <b>Salt</b>        | <b>HT Salt</b>  |                  | <b>LT Salt</b>  |                  |                  |                  |
|--------------------|-----------------|------------------|-----------------|------------------|------------------|------------------|
| <b>Molecule</b>    | Nicotinium      | 2,6-DHB          | Nicotinium #1   | Nicotinium #2    | 2,6-DHB #1       | 2,6-DHB #2       |
| <b>Heteroatoms</b> | C1-C10<br>N1-N2 | C11-C17<br>O1-O4 | C1-C10<br>N1-N2 | C11-C20<br>N3-N4 | C21-C27<br>O5-O8 | C28-C34<br>O1-O4 |

## Crystal Images and Morphologies

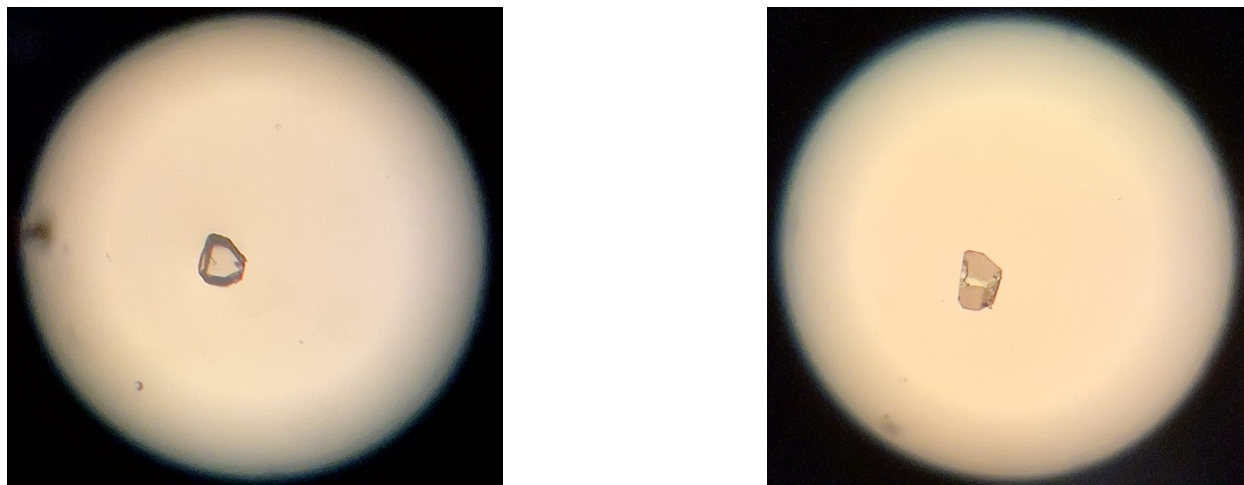

**Figure S15:** Optical microscopy images of a crystal of (S)-nicotinium 2,6-dihydroxybenzoate.

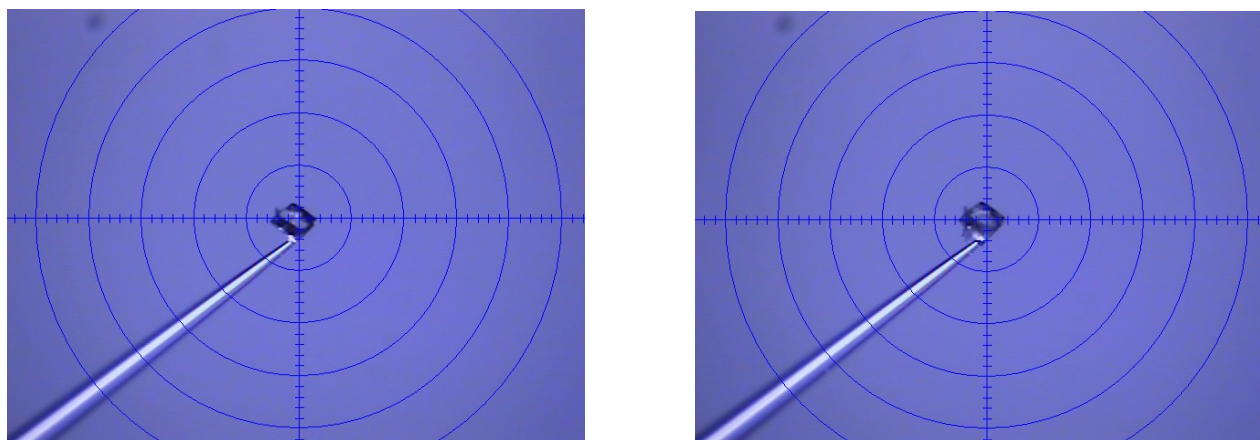

**Figure S16:** Images of a crystal mounted on the goniometer at 90 K (LT salt; left) and at 293 K (HT salt; right). No visible cracks or defects can be observed at the low temperature in comparison to the higher temperature.

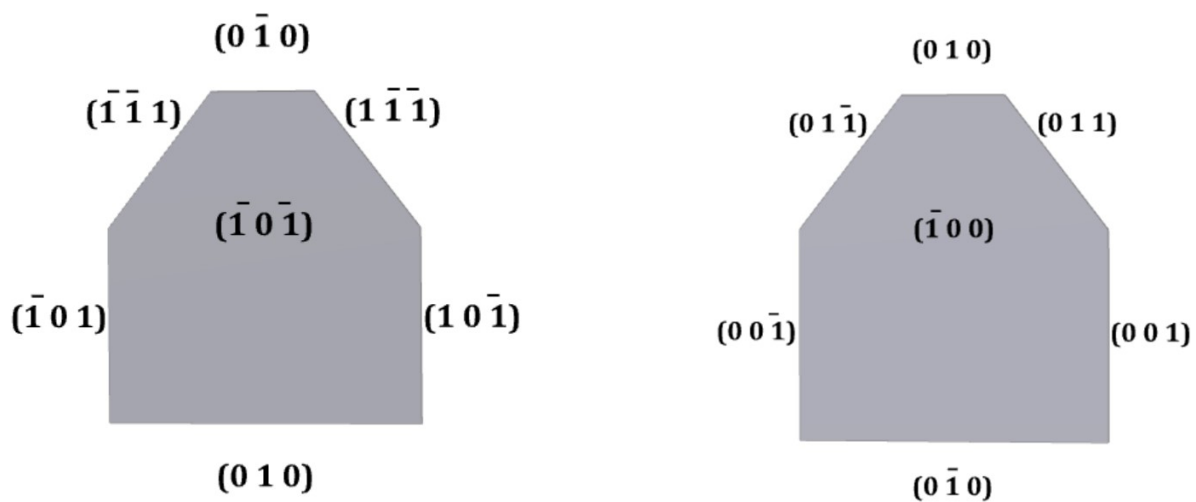

**Figure S17:** Simulated virtual morphology depictions of the crystallographic orientation of a crystal of (S)-nicotinium 2,6-dihydroxybenzoate at 90 K (**LT salt**; left) and at 293 K (**HT salt**; right) generated using WinXMorph.

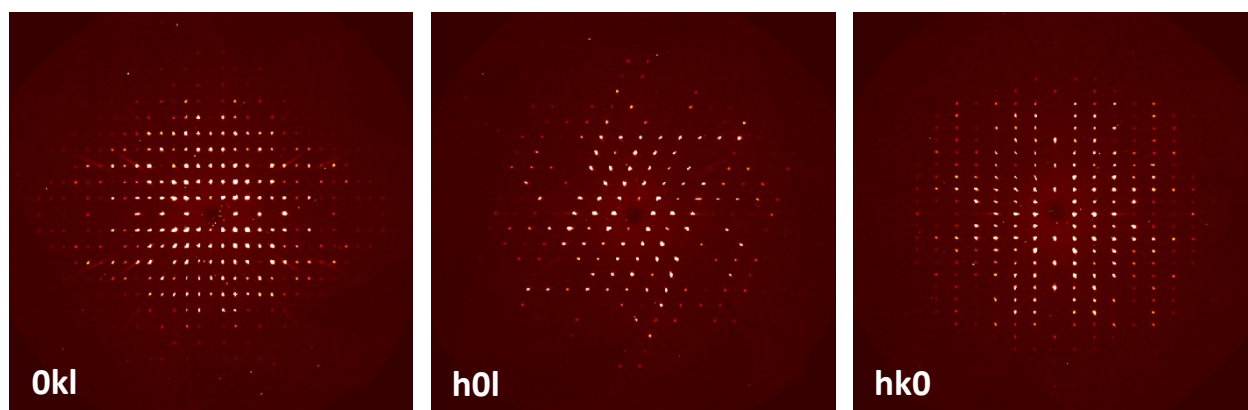

**Figure S18:** Calculated precession images for **HT salt** with miller planes indicated. Precession images were calculated using a resolution of 0.71 Å, the edge of the image. A layer thickness of 0.10 was utilized.

### Calculated Precession Images

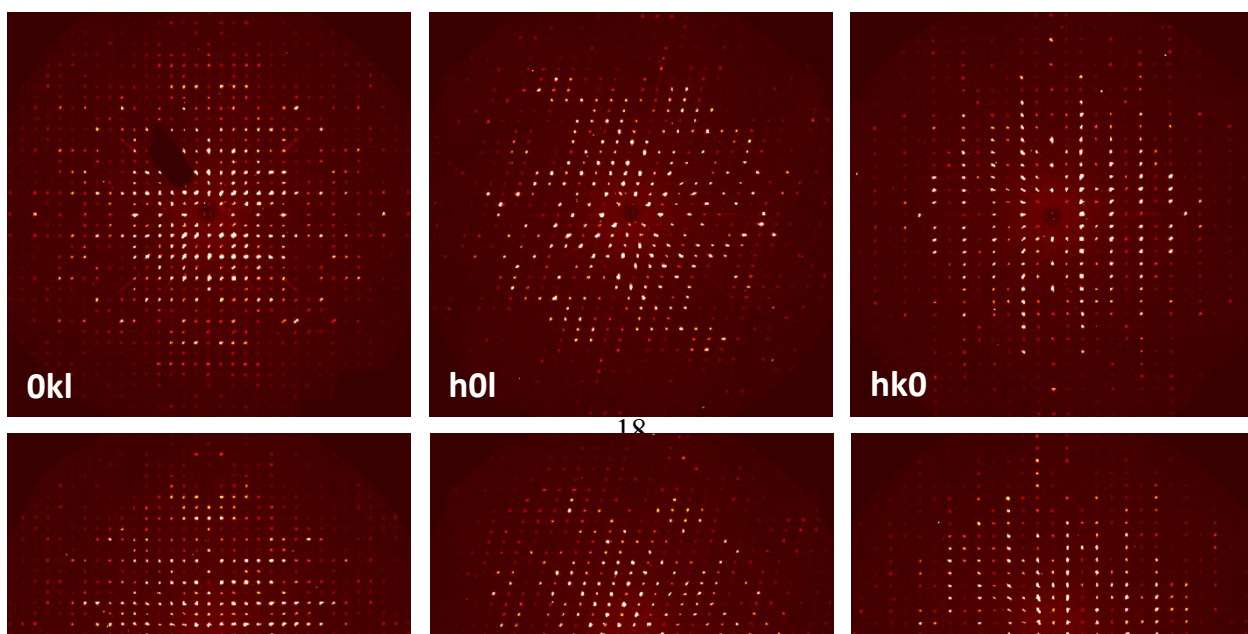

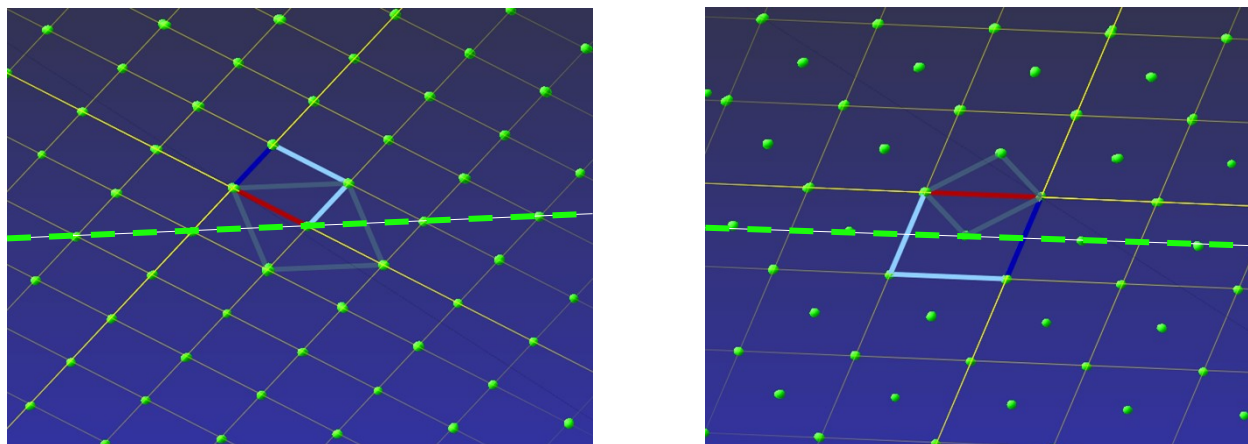

**Figure S20:** View of reciprocal lattice perpendicular to  $ac$  plane for data collected at 90 K in which larger  $P2_1$  is highlighted (left) and reduced cell is highlighted (right). The dashed green line is  $(hk0.5)$  in the reduced cell setting.  $a^*$ -axis (red),  $c^*$ -axis (dark blue).

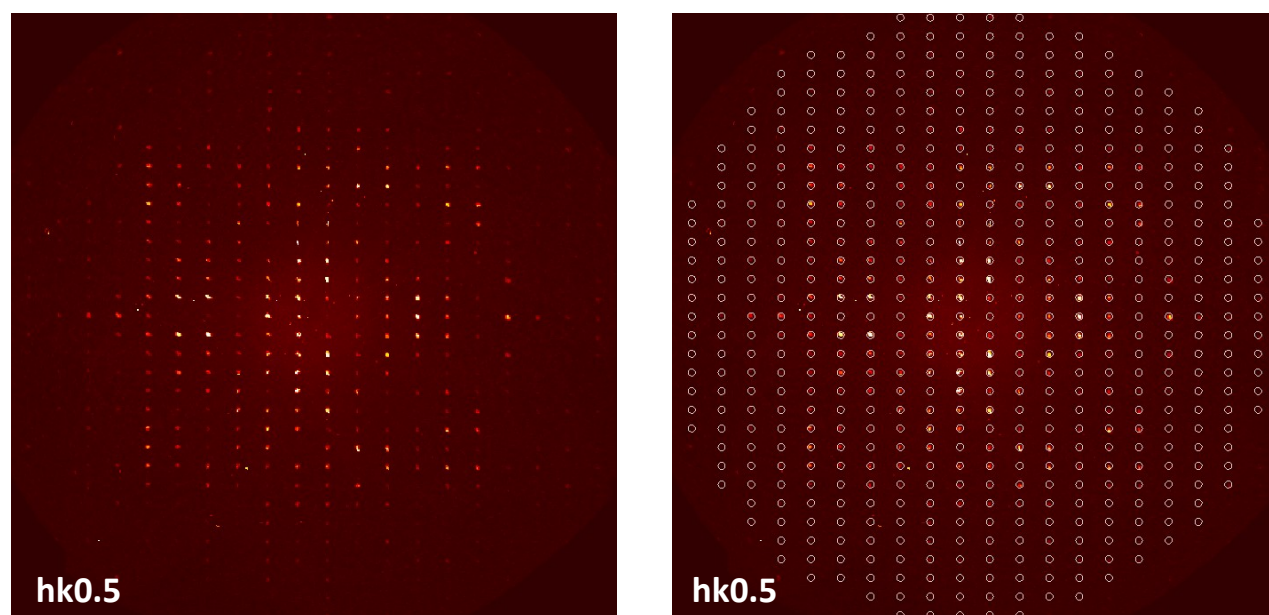

**Figure S21:** Calculated precession image for  $(hk0.5)$  in the reduced cell setting for data collected at 90 K. Spot position overlays for reduced cell (left) and proposed larger primitive monoclinic cell (right). No spot overlays are visible for the reduced cell as this is a non-integer layer. Precession images were calculated using a resolution of  $0.71 \text{ \AA}$ , the edge of the image.

PLATON/ADDSYM Images

```

PLATON/ADDSYM for LT_Salt          P 1 21 1
ADDSYM Search on ALL NON-H Chem. Types (Treated EQUAL) [Max NonFlt 20 Perc]
Criteria 1.00 Deg (Metric), 0.25 Ang (Rot), 0.45 Ang (Inv), 0.45 Ang (Transl)
Symm. Input Reduced (Ang)          (Deg) Perc AvrDev. (Ang)          Input Cell
Elem Cell_Row Cell_Row d Typ Dot Angle Flt MaxDev.          x y z
2 [ 0 1 0] [ 0 0 1] 11.55 2 1 0 100 0.121 Through 1/2 0 0
1 C12 -C2 0.212 Screw 0 1/2 0
Reduced-to-Convent          Input-to-Reduced          T = Input-to-Convent:          a' = T a
( 1 0 0 ) ( 1/2 0 1/2 ) ( 1/2 0 1/2 ) Det(T)
( 0 0 -1 ) X ( 1/2 0 -1/2 ) = ( 0 -1 0 ) =
( 0 1 0 ) ( 0 1 0 ) ( 1/2 0 -1/2 ) 0.500
Cell Lattice a b c Alpha Beta Gamma Volume CrystalSystem Lave
Input mP 9.969 11.552 13.820 90.00 102.00 90.00 1557 monoclinic 2/m
Reduced P 7.634 9.322 11.552 90.00 90.00 108.77 778
Convent mP 7.634 11.552 9.322 90.00 108.77 90.00 778 monoclinic 2/m
:: Origin Shifted to: 0.500, 0.000, 0.500 after Cell Transformation
Missed/Additional Symmetry : Suggested SPGR = P21 (No 4)

```

```

PLATON/ADDSYM for B21          B 2yb
ADDSYM Search on ALL NON-H Chem. Types (Treated EQUAL) [Max NonFlt 20 Perc]
Criteria 1.00 Deg (Metric), 0.25 Ang (Rot), 0.45 Ang (Inv), 0.45 Ang (Transl)
Symm. Input Reduced (Ang)          (Deg) Perc AvrDev. (Ang)          Input Cell
Elem Cell_Row Cell_Row d Typ Dot Angle Flt MaxDev.          x y z
2 [ 0 1 0] [ 0 0 1] 11.55 2 1 0 100 0 Through 1/2 0 0
1 0 Screw 0 1/2 0
Reduced-to-Convent          Input-to-Reduced          T = Input-to-Convent:          a' = T a
( 1 0 0 ) ( -1/2 0 -1/2 ) ( -1/2 0 -1/2 ) Det(T)
( 0 0 -1 ) X ( -1/2 0 1/2 ) = ( 0 -1 0 ) =
( 0 1 0 ) ( 0 1 0 ) ( -1/2 0 1/2 ) 0.500
Cell Lattice a b c Alpha Beta Gamma Volume CrystalSystem Lave
Input mB 9.969 11.552 13.820 90.00 102.00 90.00 1557 monoclinic 2/m
Reduced P 7.634 9.322 11.552 90.00 90.00 108.77 778
Convent mP 7.634 11.552 9.322 90.00 108.77 90.00 778 monoclinic 2/m
:: Input B21          Non-Standard Setting Is Alternate for Standard P21          Setting

```

**Figure S22:** PLATON/ADDSYM readouts for the large cell  $P2_1$  cell setting (LT salt; upper) and the  $B2_1$  cell setting (lower) with both readouts indicating a reduction to a smaller  $P2_1$  cell setting.

**Table S4:** Hydrogen bonding distances and geometries for **HT salt**.

| <b>Interacting Atoms (D—H...A)</b>                               | <b>D—H Distance (Å)</b> | <b>H...A Distance (Å)</b> | <b>D...A Distance (Å)</b> | <b>D—H...A Angle (°)</b> |
|------------------------------------------------------------------|-------------------------|---------------------------|---------------------------|--------------------------|
| C7—H7B...O1 <sup>i</sup>                                         | 0.97                    | 2.66                      | 3.603 (3)                 | 165                      |
| C8—H8A...O4 <sup>ii</sup>                                        | 0.97                    | 2.58                      | 3.192 (4)                 | 121                      |
| N1—H1...O1                                                       | 0.90 (3)                | 1.80 (3)                  | 2.701 (3)                 | 175 (3)                  |
| O3—H3A...O1                                                      | 0.92 (5)                | 1.68 (5)                  | 2.528 (3)                 | 152 (4)                  |
| O4—H4...O2                                                       | 0.101 (5)               | 1.60 (5)                  | 2.521 (4)                 | 149 (4)                  |
| Symmetry codes: (i) $-x+1, y-1/2, -z+1$ ; (ii) $-x, y-1/2, -z$ . |                         |                           |                           |                          |

**Hydrogen Bonding Interaction Tables**

**Table S5:** Hydrogen bonding distances and geometries for **LT salt**.

| <b>Interacting Atoms<br/>(D—H···A)</b>                                                                                                                     | <b>D—H Distance (Å)</b> | <b>H···A Distance (Å)</b> | <b>D···A Distance (Å)</b> | <b>D—H···A Angle (°)</b> |
|------------------------------------------------------------------------------------------------------------------------------------------------------------|-------------------------|---------------------------|---------------------------|--------------------------|
| C11—H11···O2 <sup>i</sup>                                                                                                                                  | 0.93                    | 2.60                      | 3.367 (2)                 | 140                      |
| C31—H31···O6                                                                                                                                               | 0.93                    | 2.60                      | 3.278 (2)                 | 130                      |
| C17—H17A···O1                                                                                                                                              | 0.97                    | 2.56                      | 3.505 (2)                 | 165                      |
| C7—H7A···O6 <sup>ii</sup>                                                                                                                                  | 0.97                    | 2.56                      | 3.513 (2)                 | 168                      |
| C20—H20A···N2 <sup>iii</sup>                                                                                                                               | 0.96                    | 2.52                      | 3.444 (2)                 | 161                      |
| C8—H8A···O7 <sup>iv</sup>                                                                                                                                  | 0.97                    | 2.54                      | 3.283 (2)                 | 134                      |
| N1—H1···O6 <sup>v</sup>                                                                                                                                    | 0.94 (3)                | 1.76 (3)                  | 2.6981 (19)               | 175 (2)                  |
| N1—H1···O5 <sup>v</sup>                                                                                                                                    | 0.94 (3)                | 2.63 (3)                  | 3.283 (2)                 | 127 (2)                  |
| N3—H3···O1 <sup>vi</sup>                                                                                                                                   | 0.92 (3)                | 1.77 (3)                  | 2.6825 (19)               | 176 (3)                  |
| O4—H4···O2                                                                                                                                                 | 0.93 (3)                | 1.67 (3)                  | 2.5408 (19)               | 154 (2)                  |
| O8—H8···O6                                                                                                                                                 | 0.90 (3)                | 1.69 (3)                  | 2.5454 (17)               | 157 (3)                  |
| O3—H3B···O1                                                                                                                                                | 0.95 (3)                | 1.64 (3)                  | 2.5364 (17)               | 155 (2)                  |
| O7—H7···O5                                                                                                                                                 | 0.90 (3)                | 1.68 (3)                  | 2.531 (2)                 | 157 (2)                  |
| Symmetry codes: (i) $-x+2, y-1/2, -z$ ; (ii) $-x+2, y+1/2, -z$ ; (iii) $x-1, y, z-1$ ; (iv) $-x+1, y+1/2, -z$ ; (v) $x, y, z+1$ ; (vi) $-x+1, y-1/2, -z$ . |                         |                           |                           |                          |



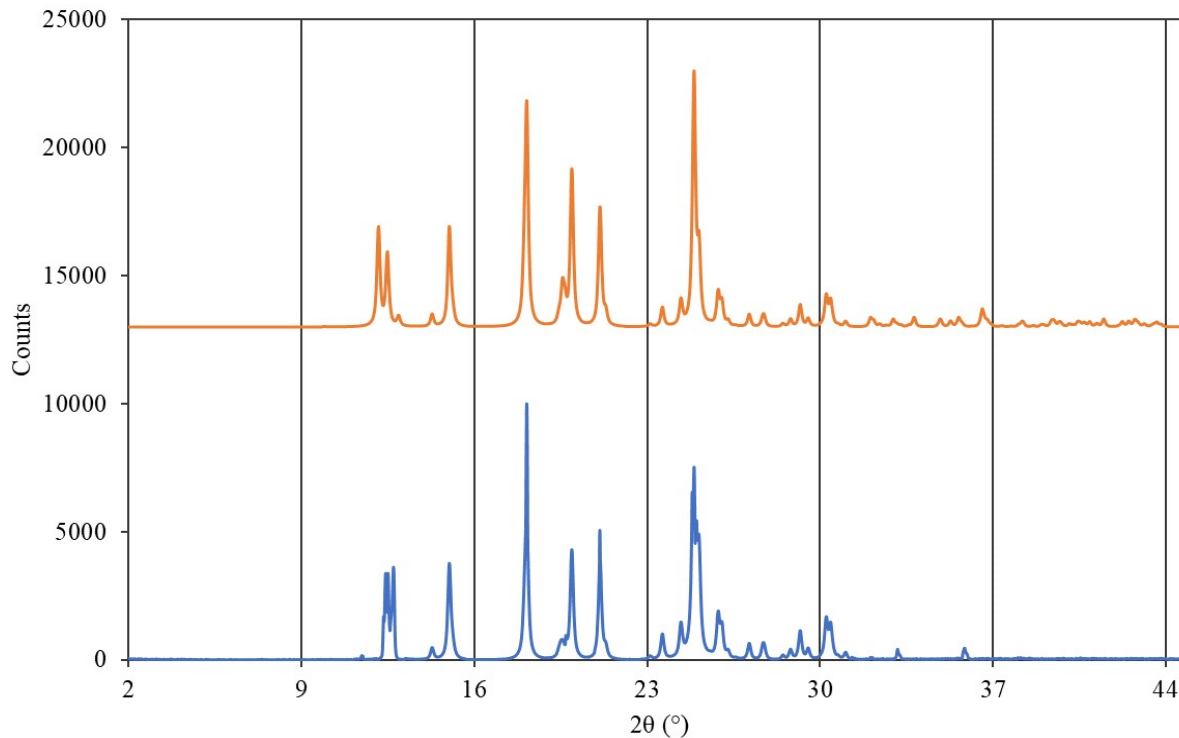

**Figure S23:** PXRD patterns of (S)-nicotinium 2,6-dihydroxybenzoate at 293 K (**HT salt**) simulated from SC-XRD analysis (upper) and experimentally obtained (lower). The simulated pattern is offset by +13,000 counts.

### Powder X-Ray Diffraction (PXRD) Pattern

LT Salt  $P2_1$  vs  $B2_1$  Symmetry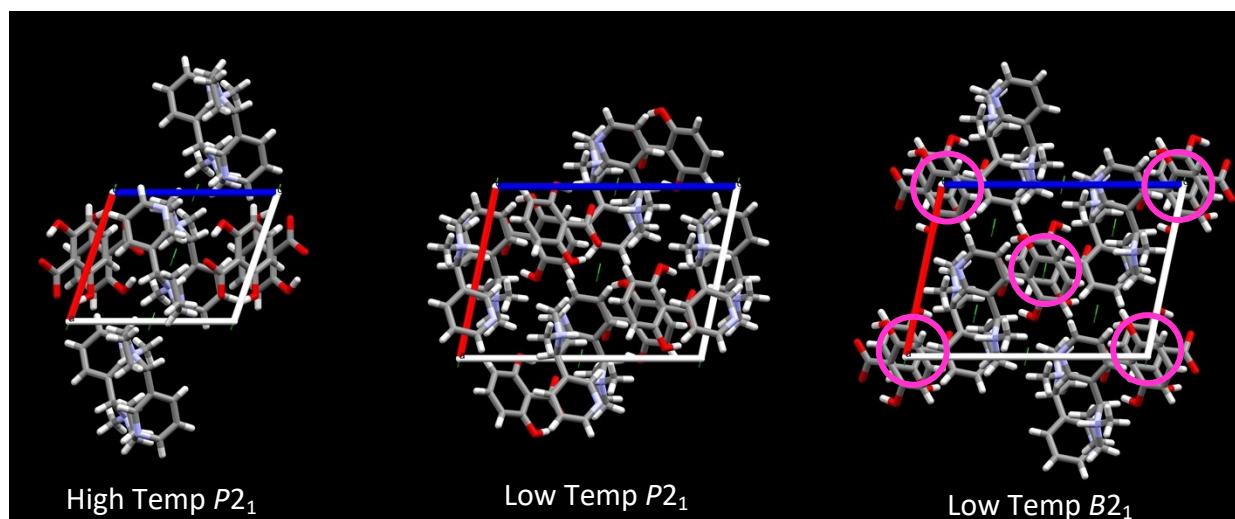

**Figure S24:** Views parallel to  $[010]$  showing the screw axes present in each structure. The screw axes that were analyzed to aid in confirmation of the  $P2_1$  refinement are circled in pink in the  $B2_1$  structure.

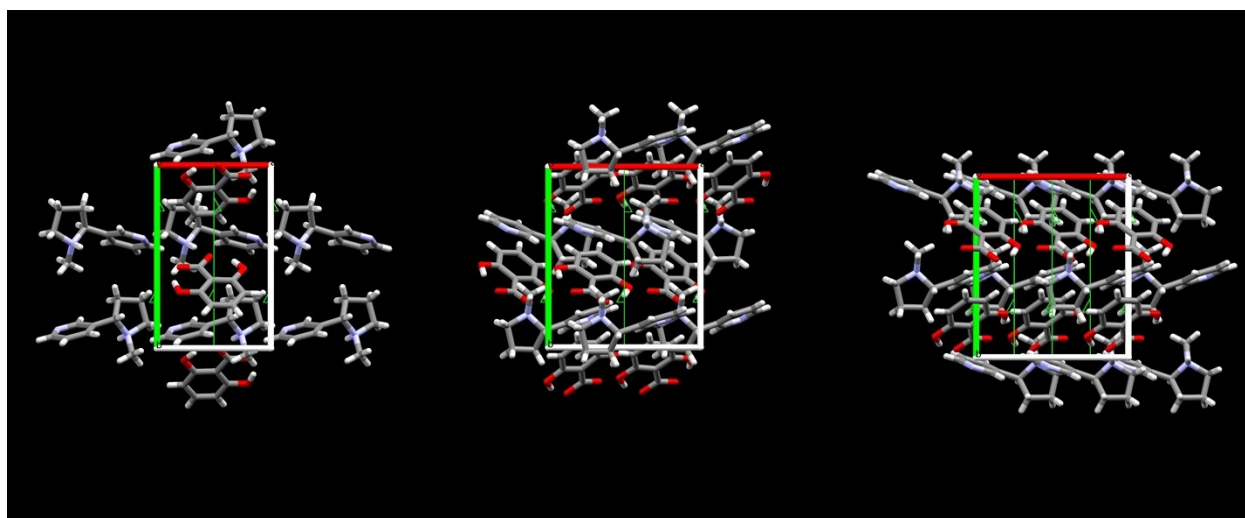

**Figure S25:** Views parallel to  $[001]$  further detailing the screw axes present in each structure.

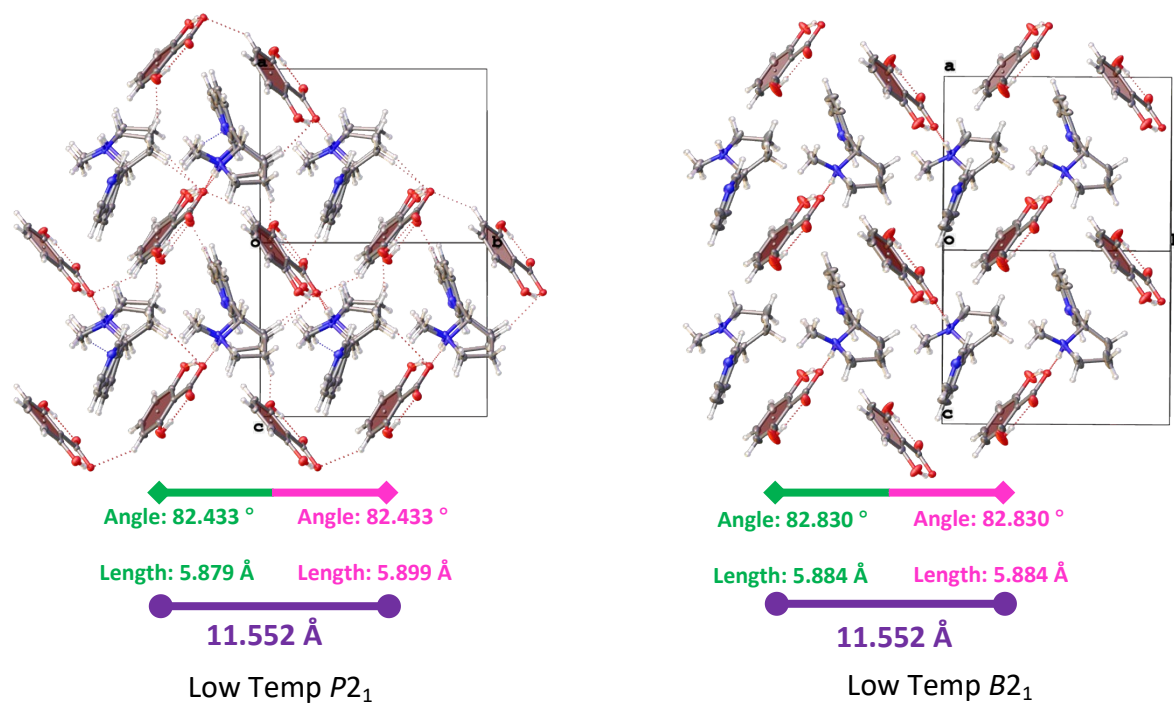

**Figure S26:** Calculated mean plane distances for the 2,6-DHB rings at 90 K showing the different distances between the planes for the  $P2_1$  (left) versus what the distances would need to be for the system to be treated as  $B2_1$  (right).

**Table S6:** Fractional atomic coordinates ( $\times 10^4$ ) and equivalent isotropic displacement parameters ( $\text{\AA}^2 \times 10^3$ ) for the  $B2_1$  structure.  $U_{\text{eq}}$  is defined as 1/3 of the trace of the orthogonalised  $U_{\text{IJ}}$  tensor.

**$B2_1$  Fractional Atomic Coordinates**

| Atom | $x$         | $y$        | $z$         | $U_{\text{eq}}$ |
|------|-------------|------------|-------------|-----------------|
| O    | 8696.0(14)  | 9565.5(12) | 1613.6(10)  | 17.9(3)         |
| O1   | 10841.4(16) | 8960.1(15) | 2138.4(13)  | 31.1(4)         |
| O2   | 7270.0(18)  | 8849.1(17) | -14.2(11)   | 33.6(4)         |
| C2   | 9608(2)     | 8261.6(18) | 593.0(16)   | 19.1(4)         |
| C3   | 9740.4(19)  | 8968.1(18) | 1504.5(15)  | 18.8(4)         |
| N1   | 6068.1(18)  | 5298.5(16) | 1514.7(13)  | 24.2(4)         |
| C5   | 8577(2)     | 5791.8(18) | 2077.1(15)  | 19.5(4)         |
| N    | 10185.6(19) | 5543.8(17) | 3625.7(14)  | 25.3(4)         |
| C8   | 8955(2)     | 5857.8(18) | 3101.0(14)  | 18.6(4)         |
| O3   | 11916.2(18) | 7578(2)    | 1093(2)     | 63.3(8)         |
| C9   | 8372(2)     | 8212.3(18) | -115.9(14)  | 20.9(4)         |
| C10  | 9347(3)     | 6838(2)    | -1067.6(19) | 33.3(6)         |
| C11  | 10719(2)    | 7576(2)    | 434(2)      | 34.2(6)         |
| C12  | 7189(2)     | 6189.9(19) | 1519.5(15)  | 23.2(4)         |
| C13  | 8240(3)     | 7499(2)    | -944.9(16)  | 28.1(5)         |
| C    | 6562(2)     | 7244(2)    | 1924(2)     | 32.3(6)         |
| C14  | 10581(3)    | 6875(2)    | -396(3)     | 41.8(7)         |
| C15  | 9547(2)     | 5379(2)    | 1573.3(17)  | 33.0(6)         |
| C16  | 11096(2)    | 5157(2)    | 3115(2)     | 34.9(6)         |
| C1   | 6196(3)     | 4227(2)    | 952.2(16)   | 31.8(5)         |
| C17  | 10826(2)    | 5055(3)    | 2102(2)     | 44.0(7)         |
| C18  | 4734(2)     | 5940(2)    | 1144(2)     | 36.3(6)         |
| C6   | 5071(3)     | 7227(2)    | 1353(3)     | 61.0(11)        |

*Hirshfeld Surface Interaction Analysis***Table S7:** Interaction types and percentages for each API in the **HT salt** and **LT salt** structures.

| Interaction Type | LT Salt 2,6 DHB #2 | LT Salt 2,6 DHB #1 | HT Salt 2,6-DHB | LT Salt API #2 | LT Salt API #1 | HT Salt API |
|------------------|--------------------|--------------------|-----------------|----------------|----------------|-------------|
| O-H/H-O          | 39.3               | 37.9               | 38.0            | 18.2           | 17.6           | 17.6        |
| H-H              | 34.4               | 36.0               | 37.0            | 49.5           | 50.7           | 50.8        |
| H-C/C-H          | 22.1               | 21.7               | 21.1            | 19.1           | 18.7           | 18.3        |
| H-N/N-H          | 1.5                | 1.2                | 1.2             | 10.8           | 10.8           | 11.0        |
| O-C/C-O          | 0.6                | 1.3                | 0.8             | 1.1            | 0.7            | 0.9         |
| C-C              | 2.1                | 1.9                | 1.9             | 1.3            | 1.5            | 1.4         |

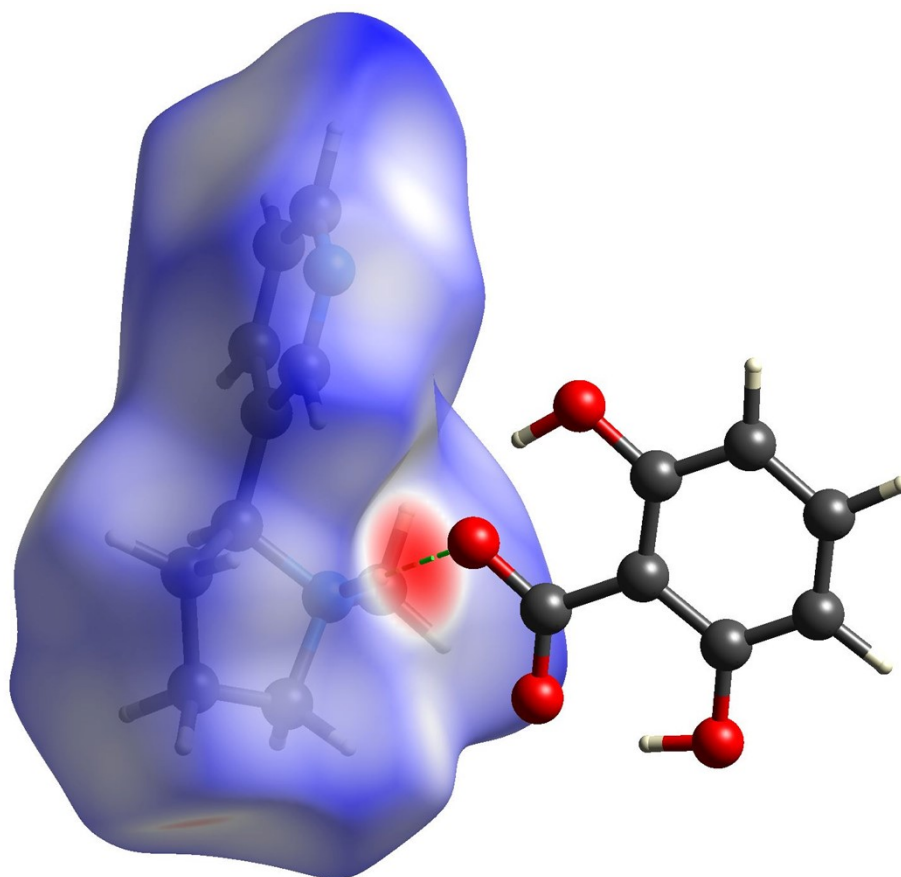**Figure S27:** Image of the API Hirshfeld surface in the **HT salt**.

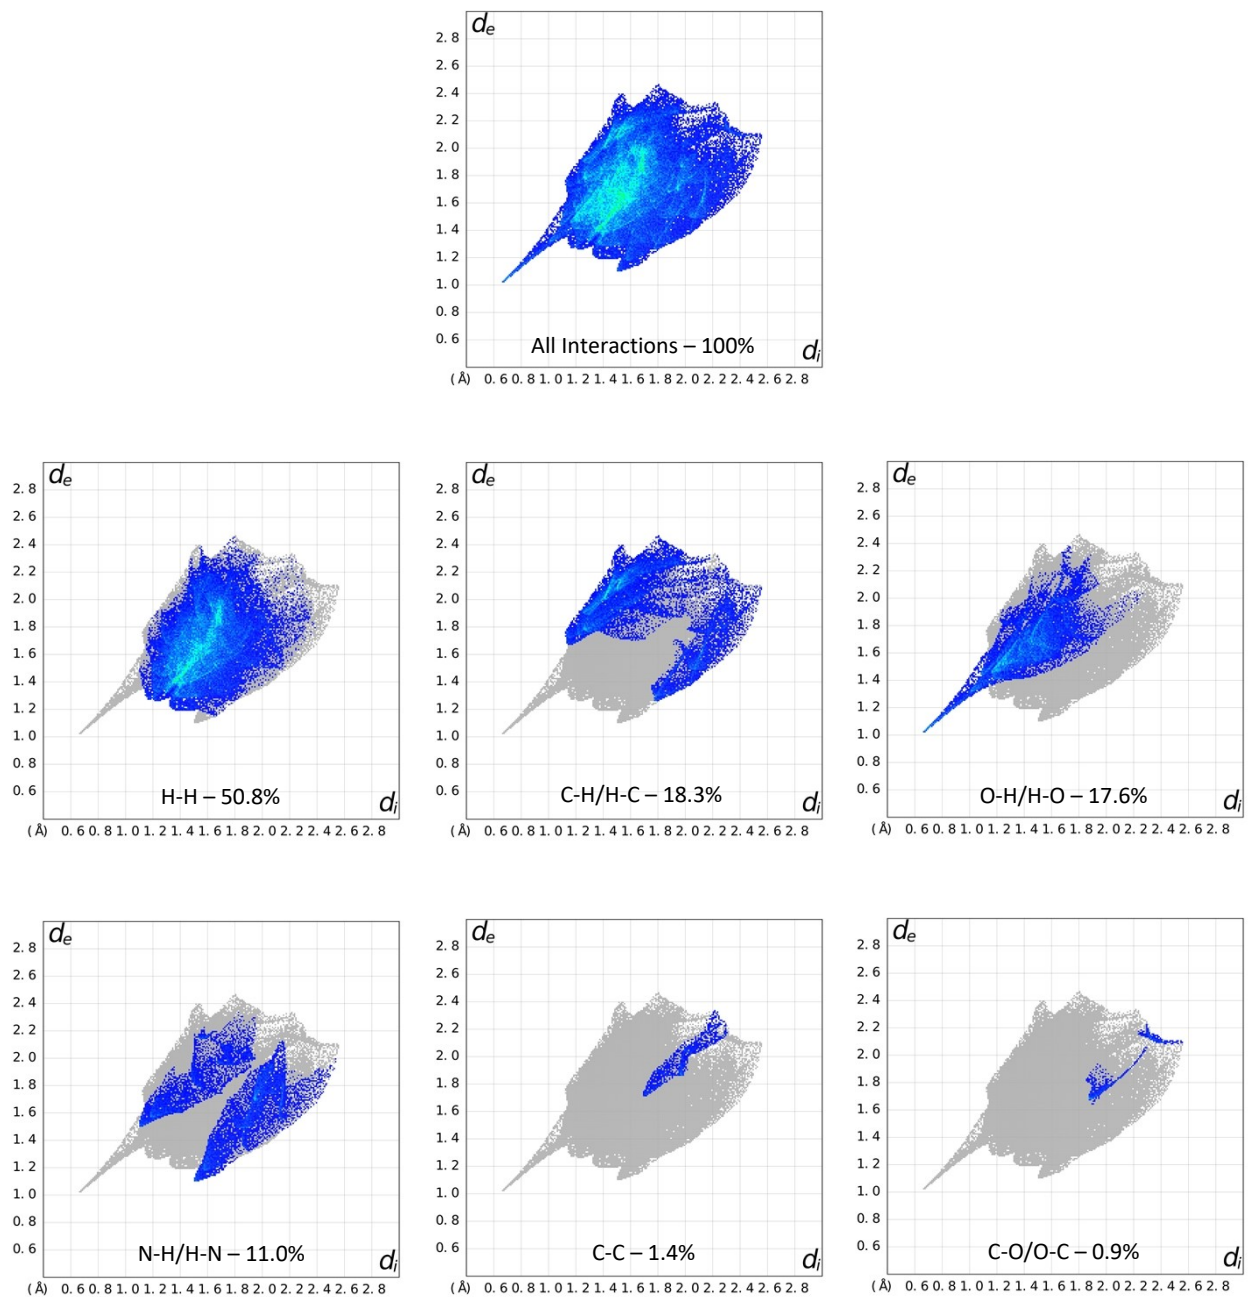

**Figure S28:** Hirshfeld surface fingerprint plots of the **HT salt**. The type of interaction and quantity is shown for each plot.

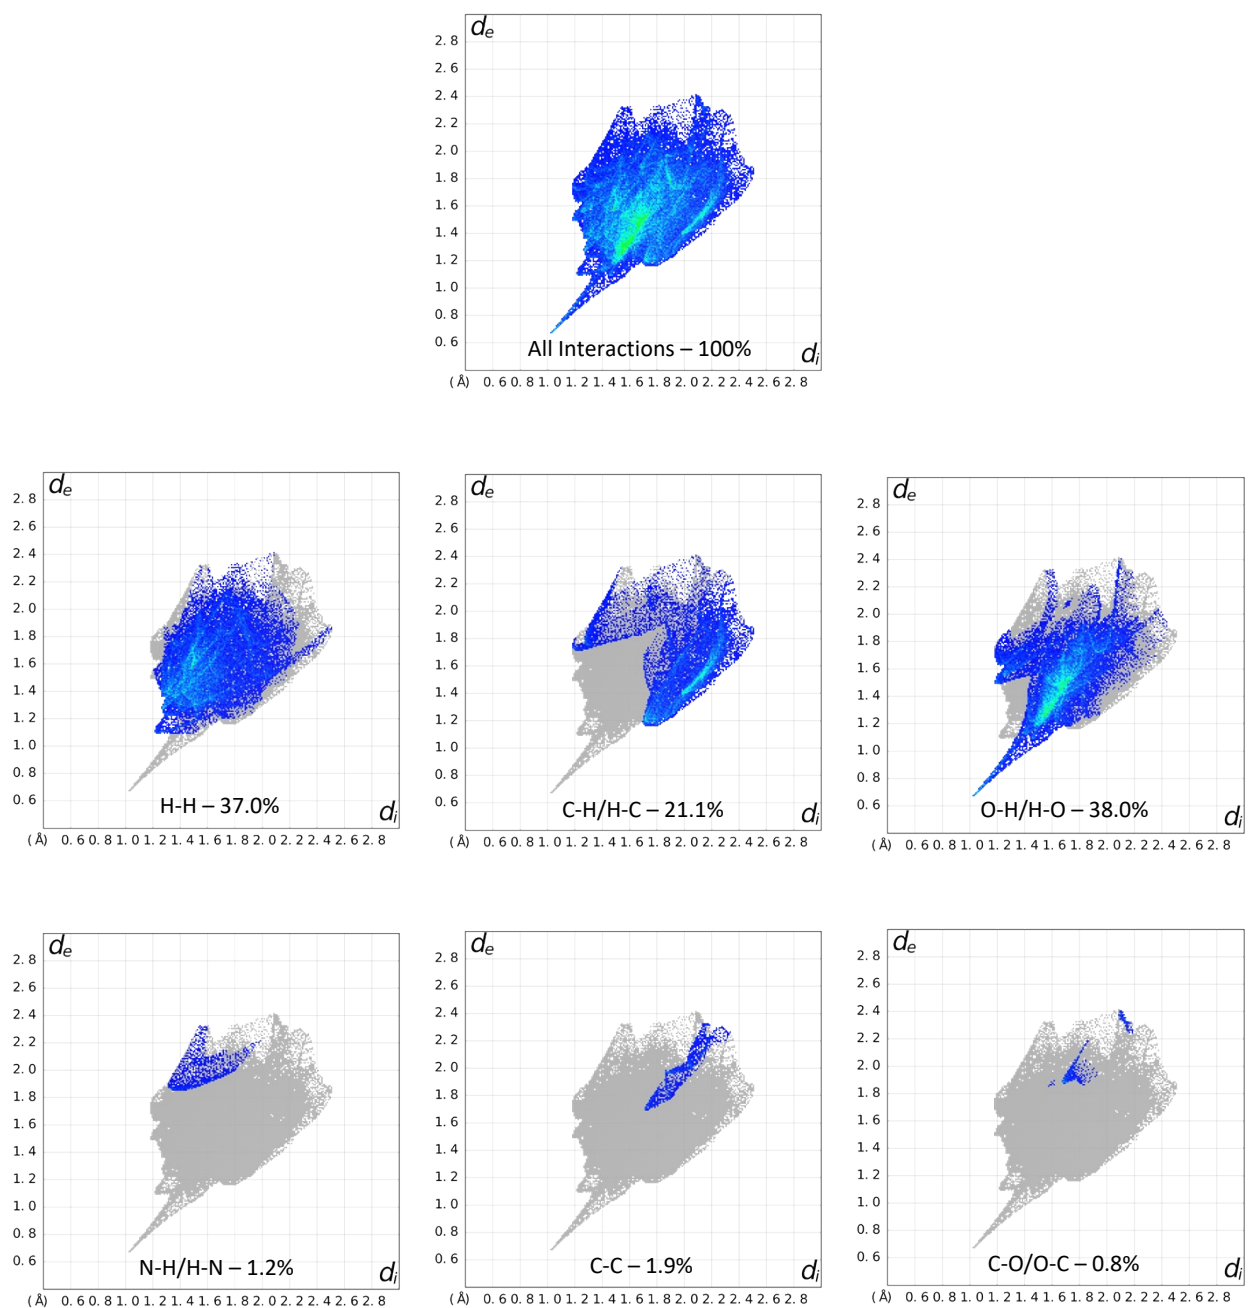

**Figure S29:** Hirshfeld surface fingerprint plots of the salt former 2,6-DHB in the HT salt. The type of interaction and quantity is shown for each plot.

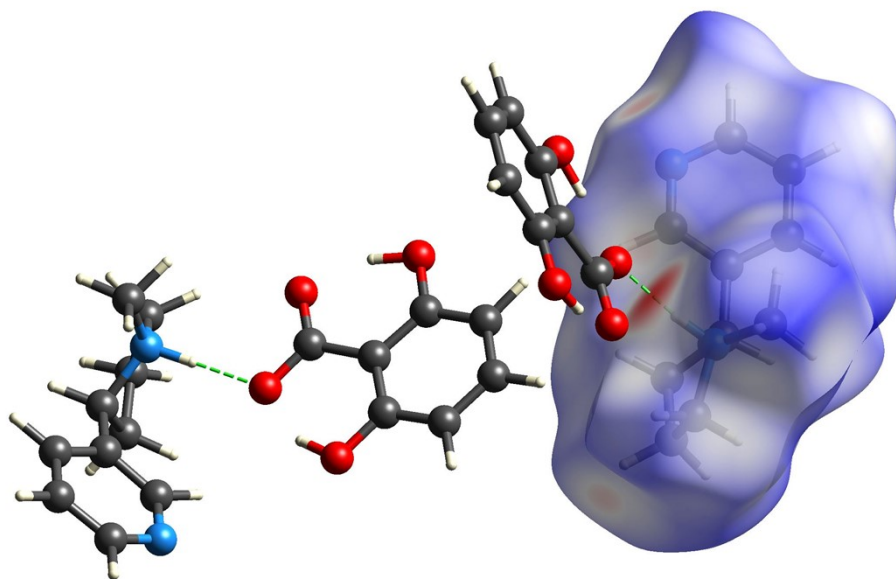

**Figure S30:** Image of the Hirshfeld surface of API #1 in the LT salt.

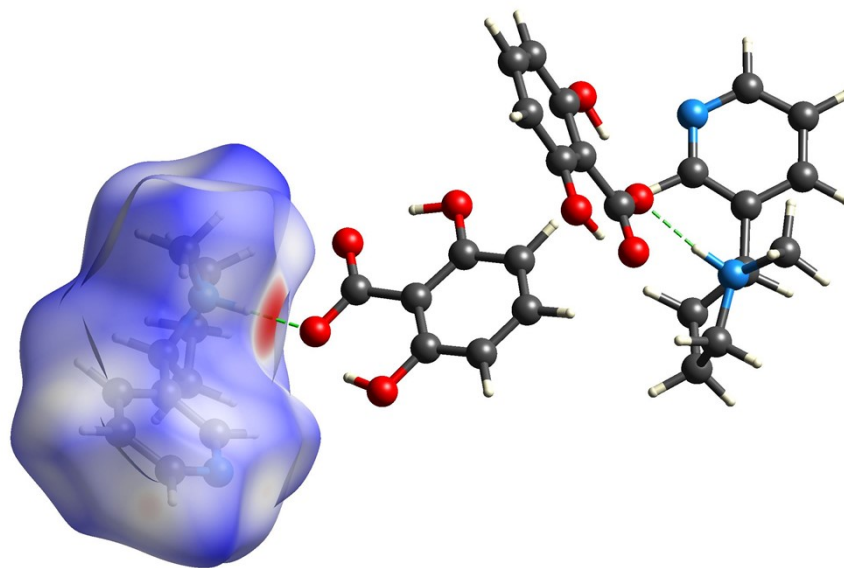

**Figure S31:** Image of the Hirshfeld surface of API #2 in the LT salt.



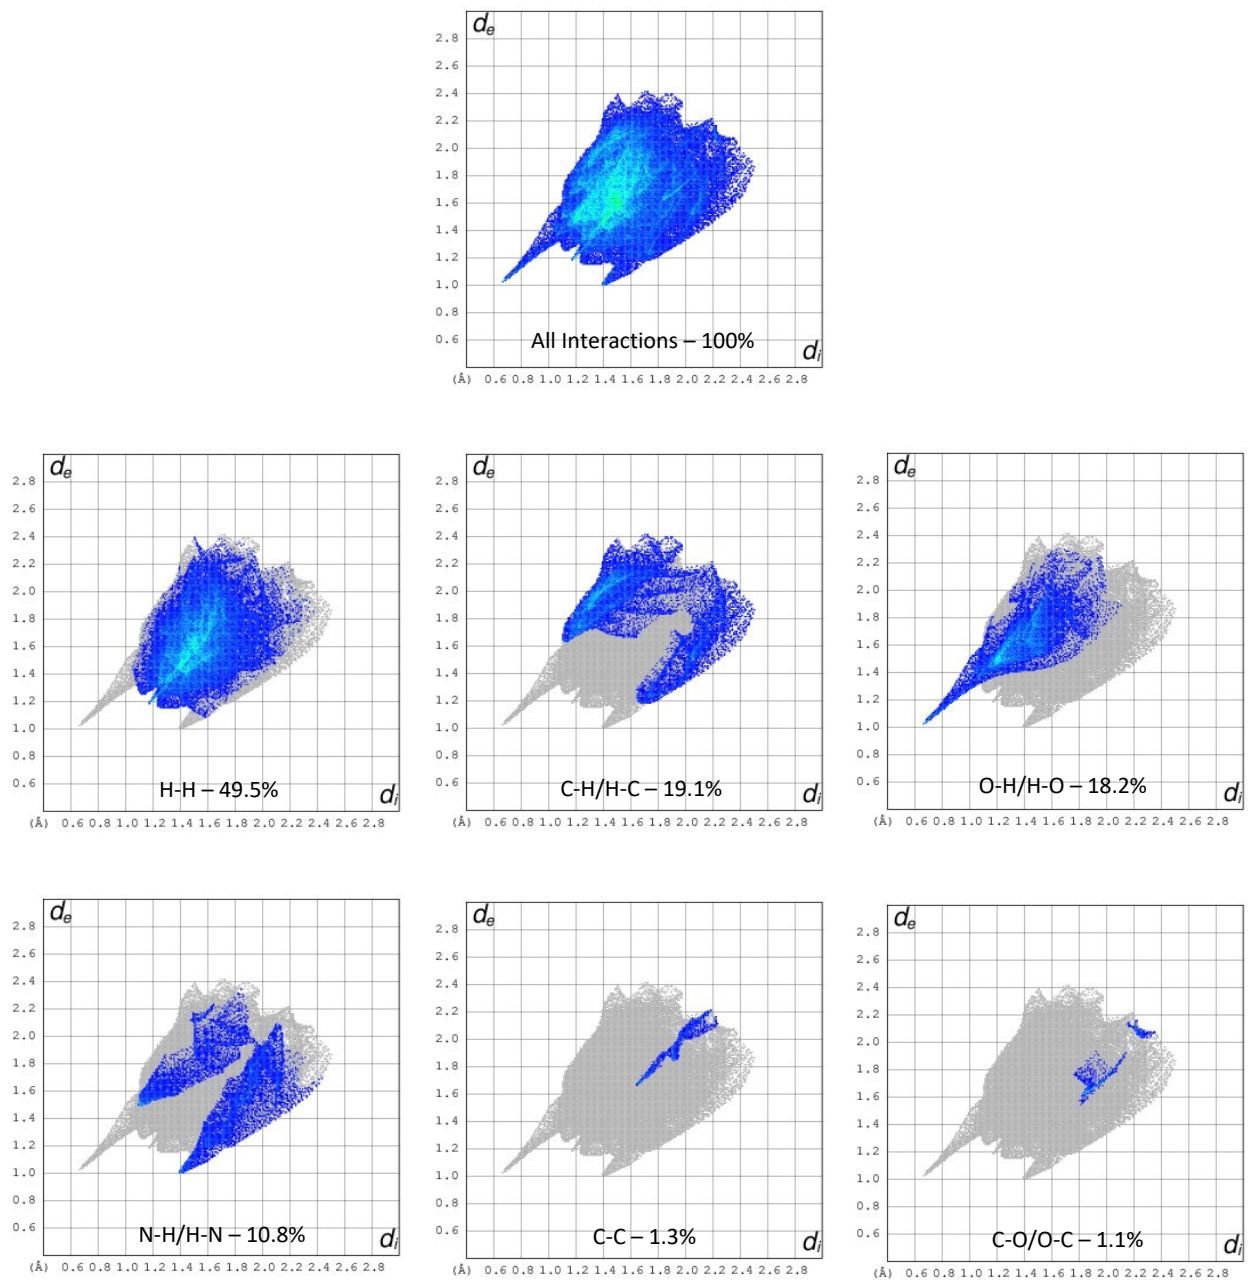

**Figure S32:** Hirshfeld surface fingerprint plots of API #1 in the **LT salt**. The type of interaction and quantity is shown for each plot.

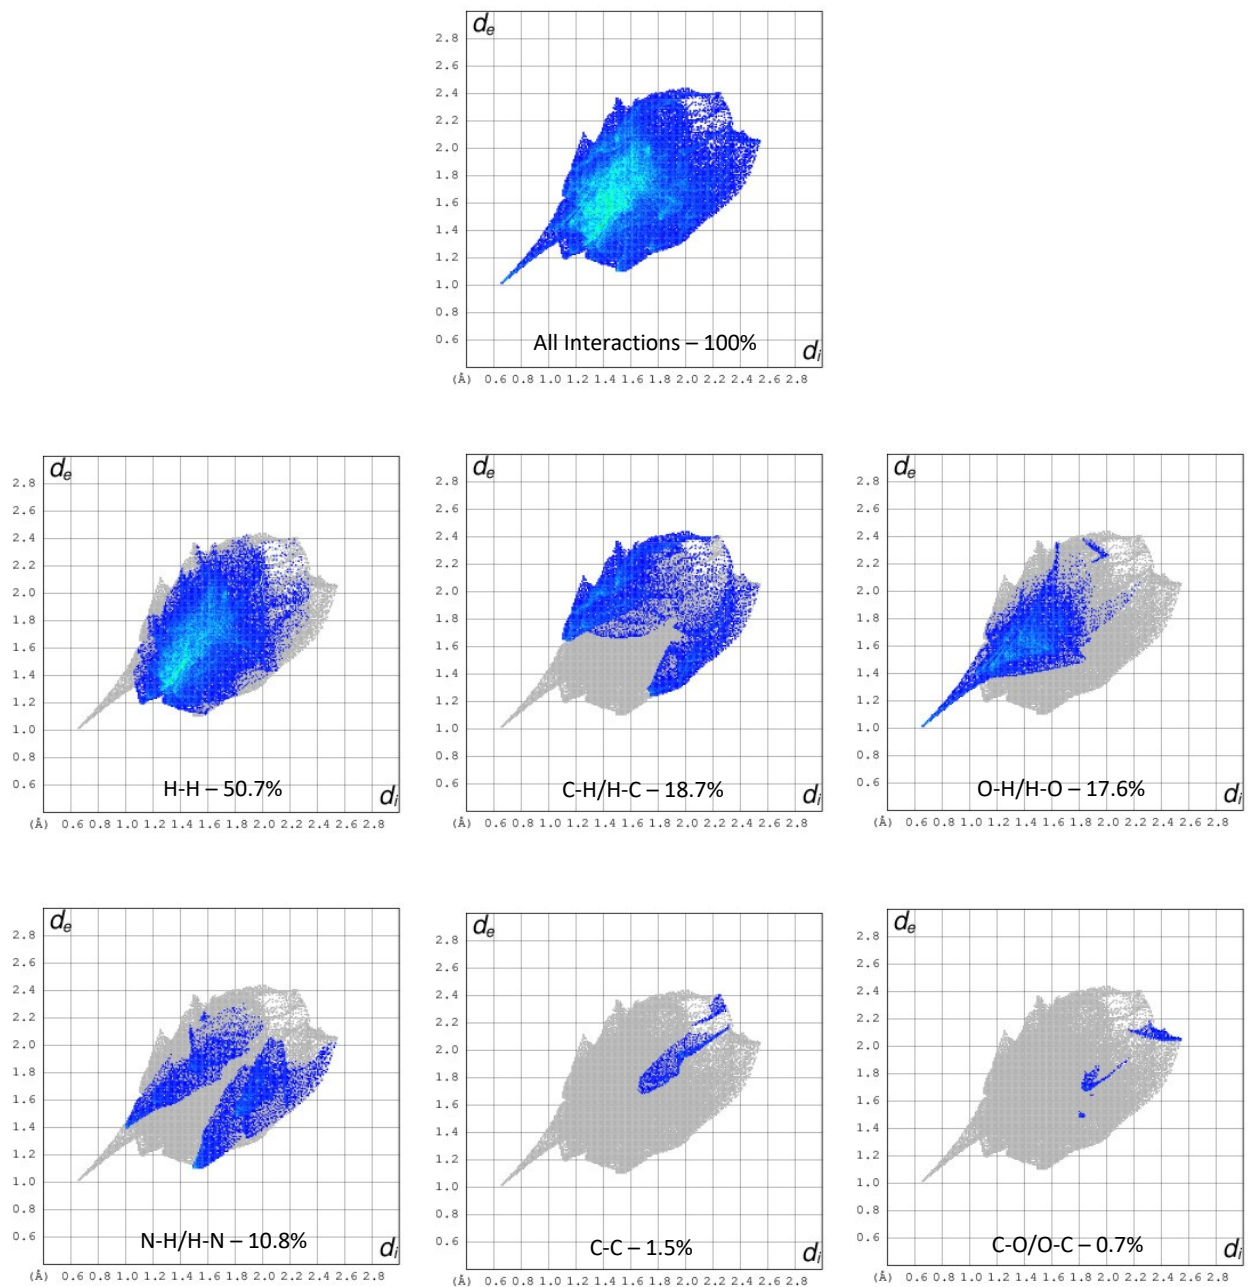

**Figure S33:** Hirshfeld surface fingerprint plots of API #2 in the **LT salt**. The type of interaction and quantity is shown for each plot.

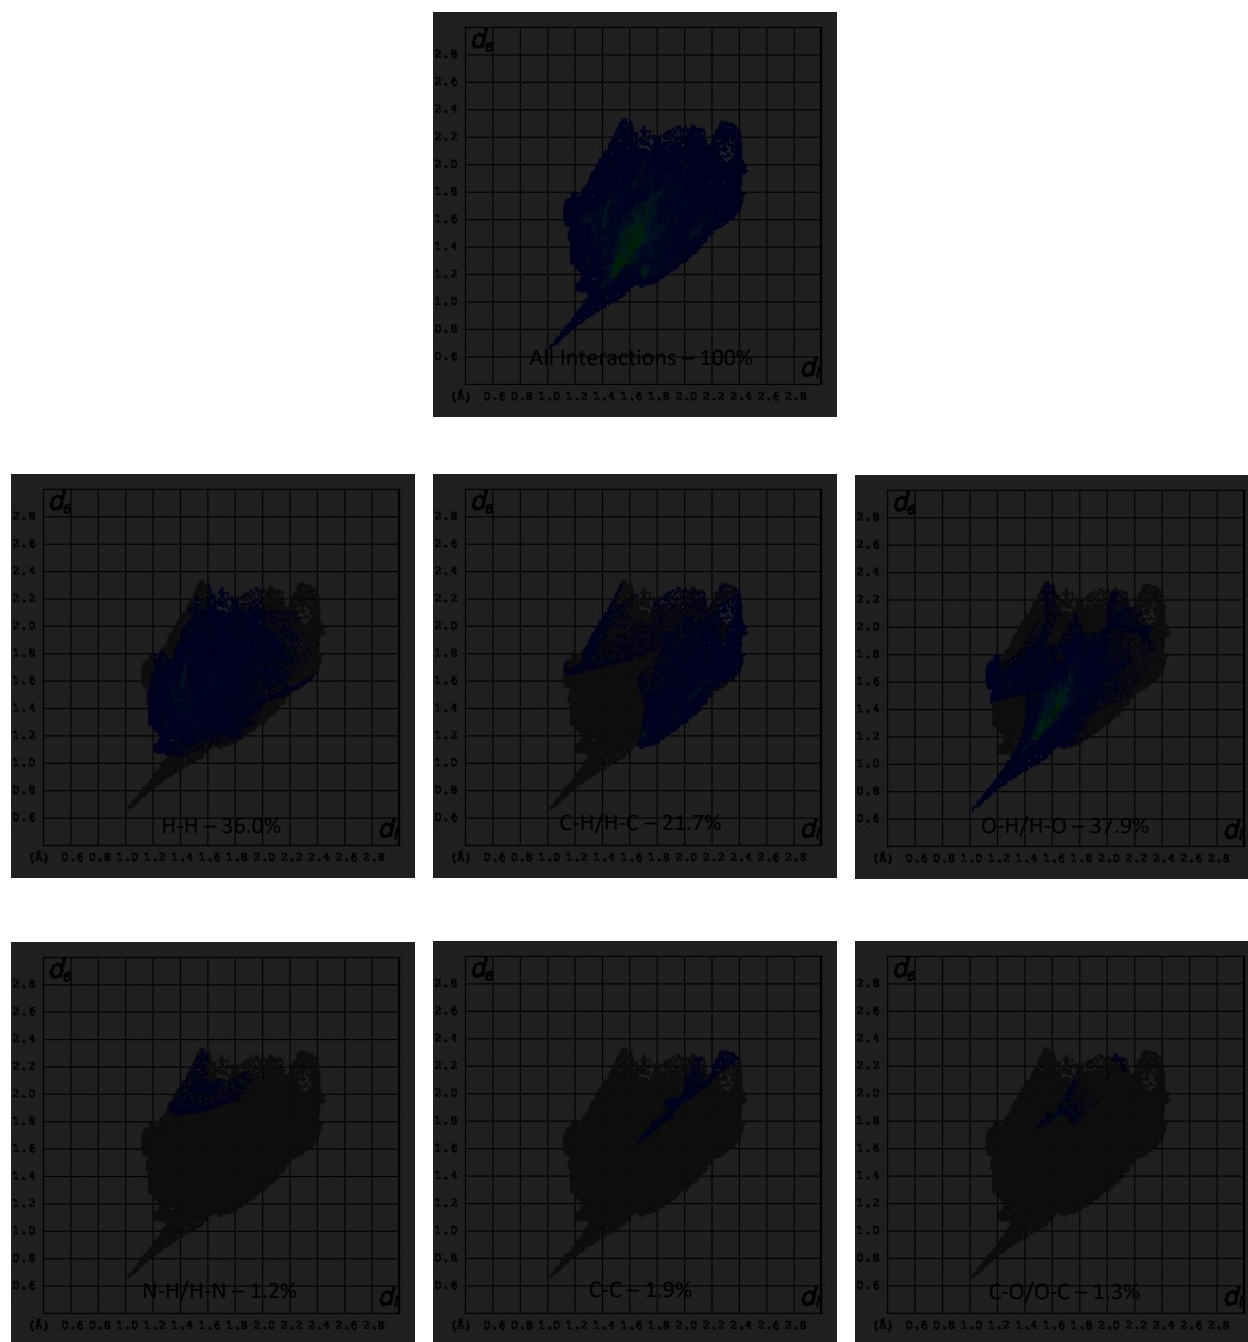

**Figure S34:** Hirshfeld surface fingerprint plots of the salt former 2,6-DHB #1 in the LT salt. The type of interaction and quantity is shown for each plot.

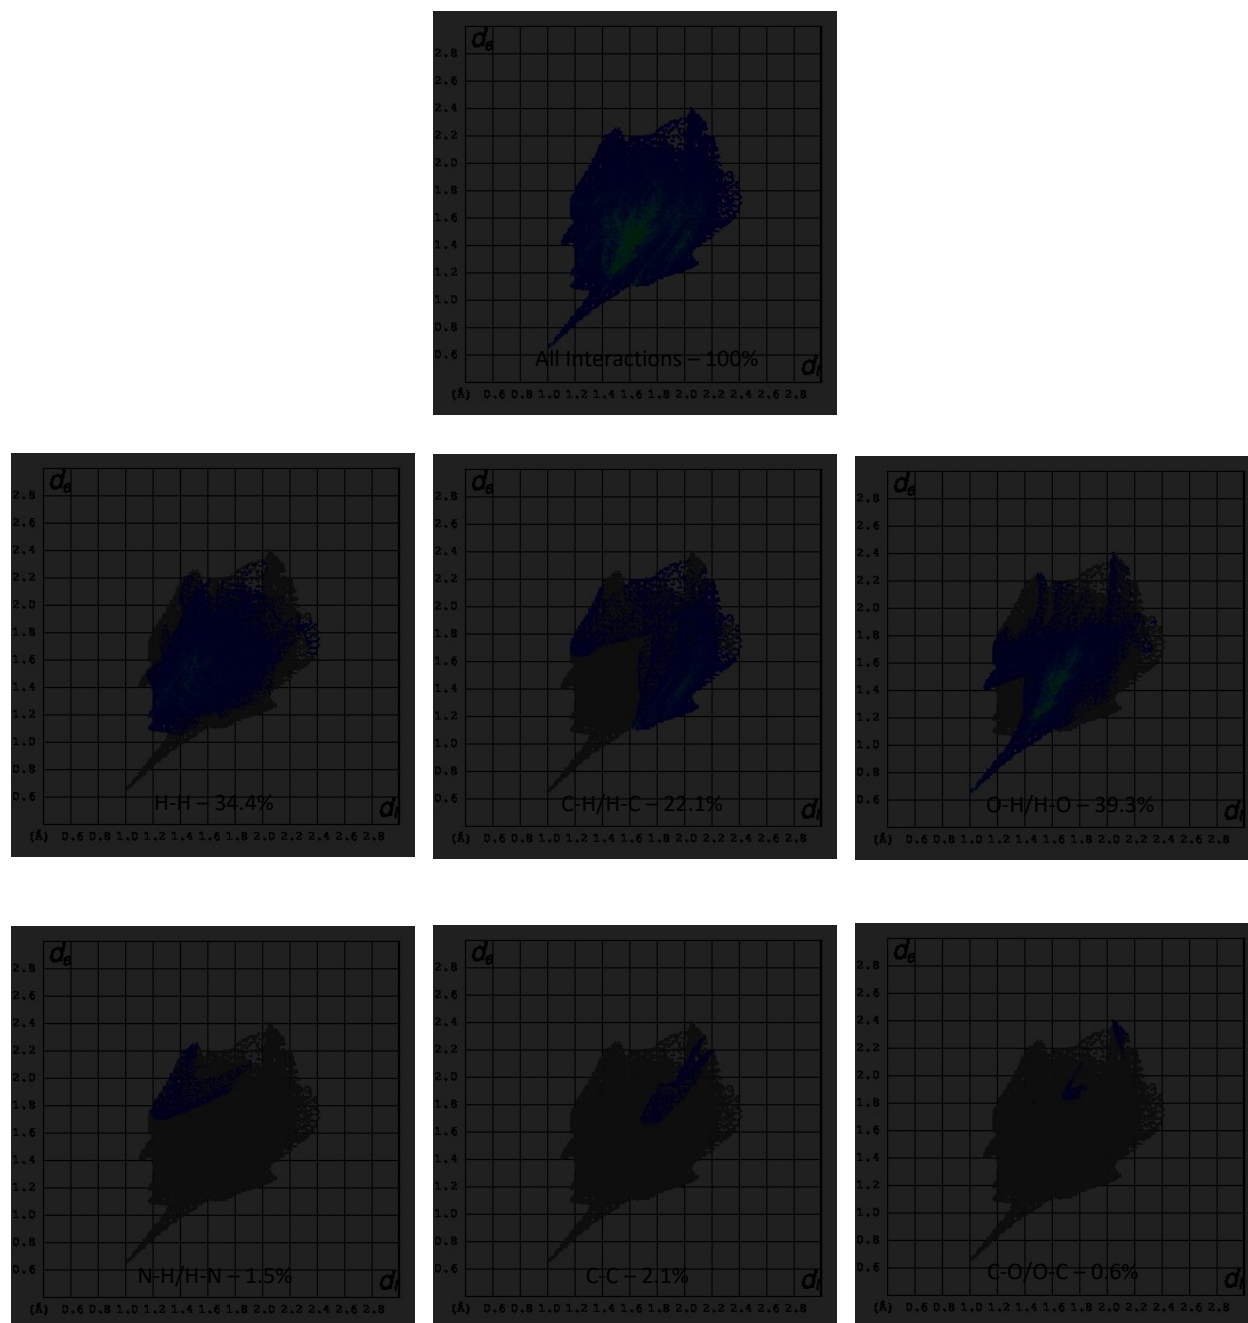

**Figure S35:** Hirshfeld surface fingerprint plots of the salt former 2,6-DHB #2 in the LT salt. The type of interaction and quantity is shown for each plot.

*Infrared (IR) Spectroscopy*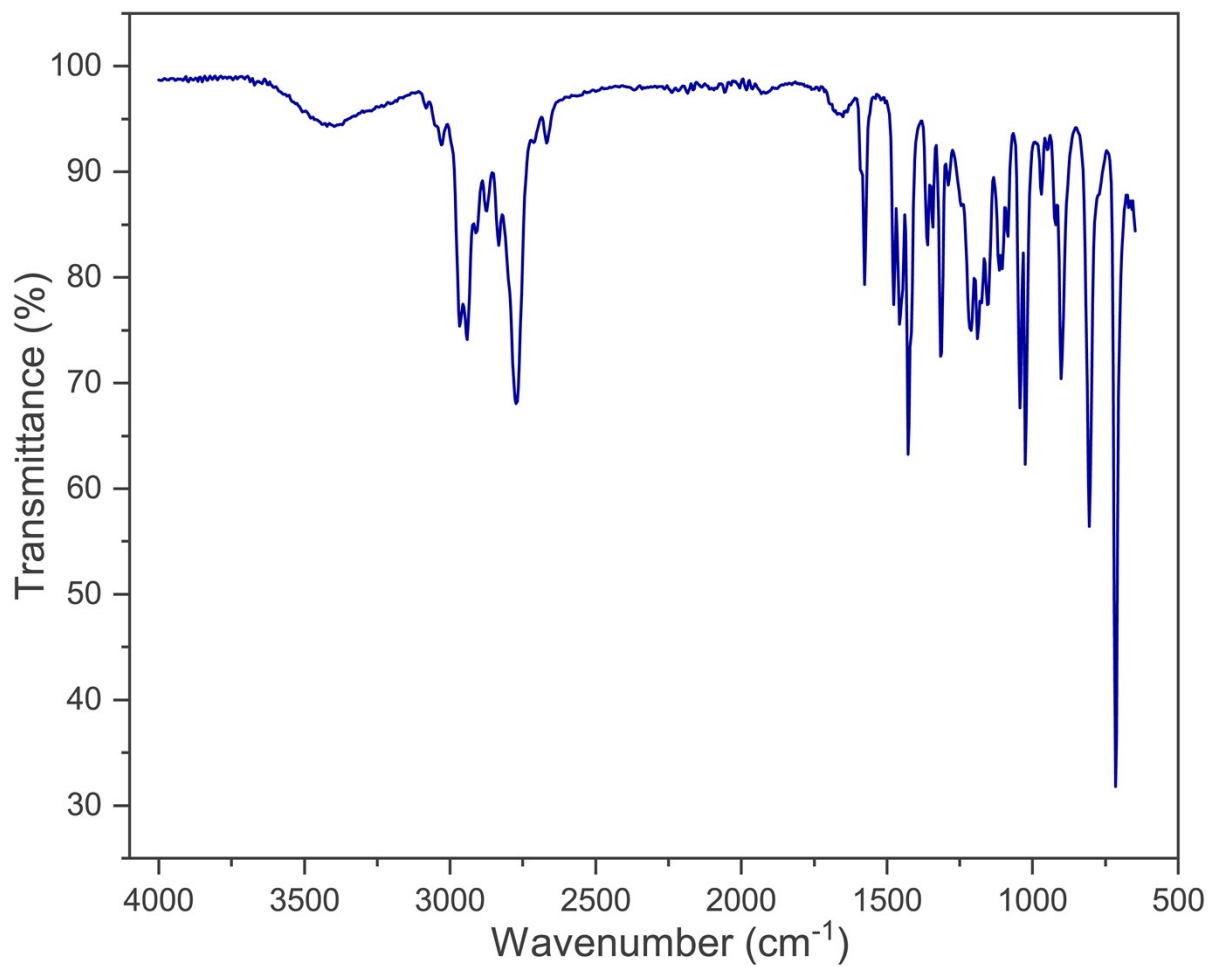

**Figure S36:** Infrared (IR) spectrum of (S)-nicotine.

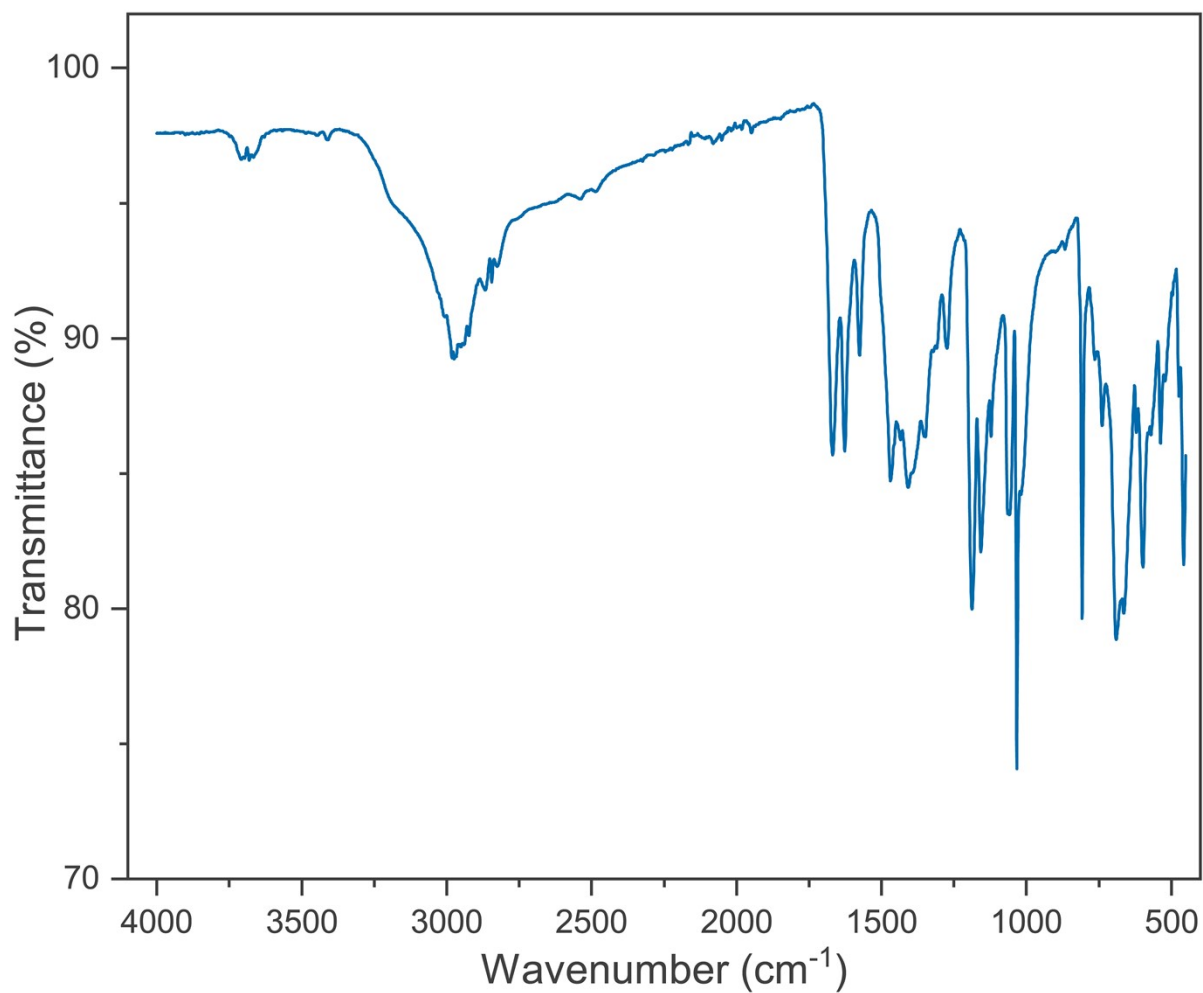

**Figure S37:** Infrared (IR) spectrum of 2,6-dihydroxybenzoic acid.

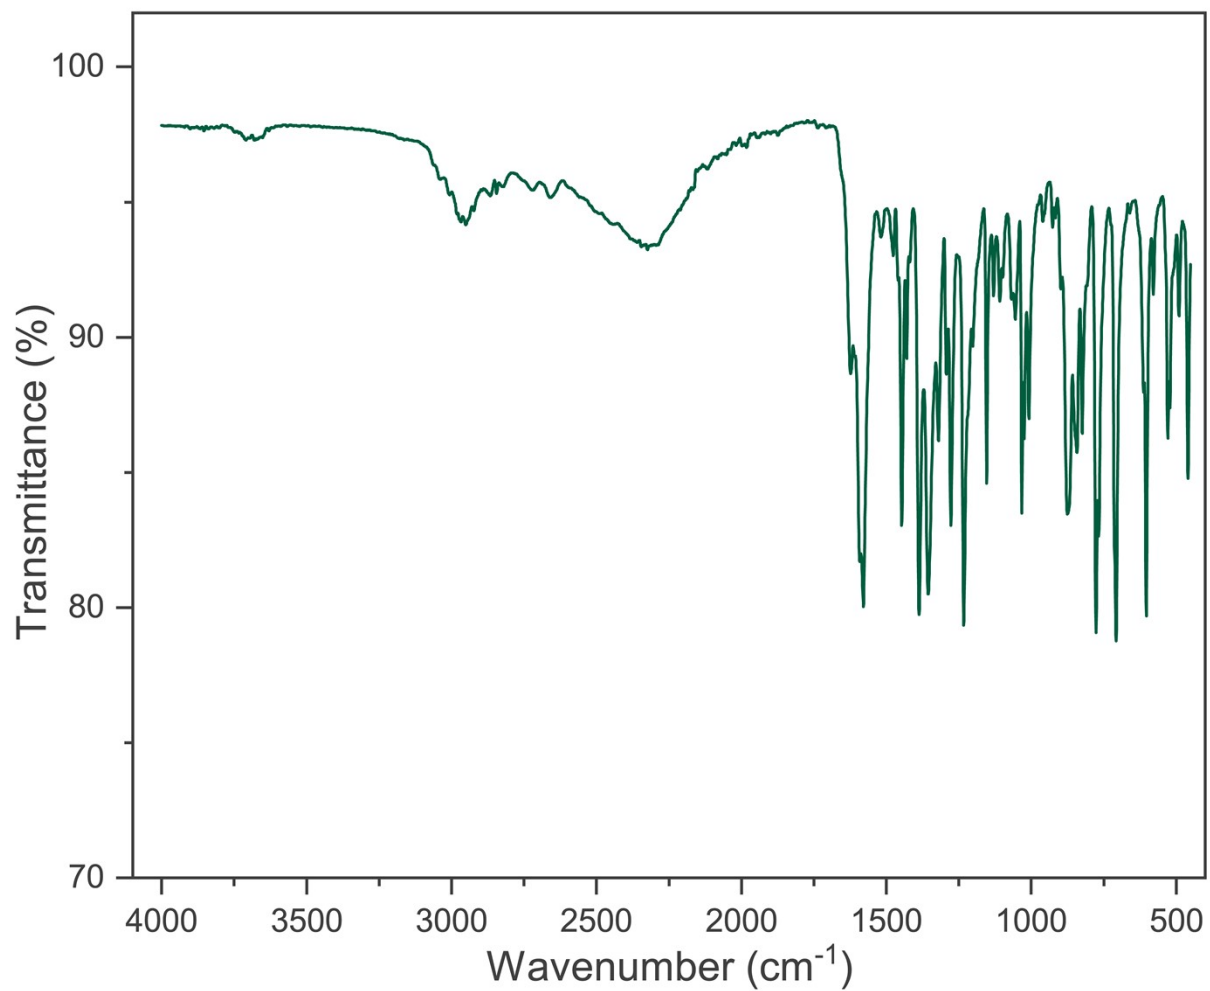

**Figure S38:** Infrared (IR) spectrum of (S)-nicotinium 2,6-dihydroxybenzoate (**HT salt**) at ambient conditions (293 K).

**Table S8:** Dynamic *in situ* X-ray diffraction data utilizing an in-house automated batch indexing program.

***Dynamic In Situ X-Ray Diffraction Batch Indexing Data***

| Batch Number | a (Å)  | Error a (Å) | b (Å)   | Error b (Å) | c (Å)  | Error c (Å) | $\alpha$ (°) | Error $\alpha$ (°) | $\beta$ (°) | Error $\beta$ (°) | $\gamma$ (°) | Error $\gamma$ (°) | Volume (Å <sup>3</sup> ) | Error Volume (Å <sup>3</sup> ) | Reflections Indexed | Total Number of Reflections |
|--------------|--------|-------------|---------|-------------|--------|-------------|--------------|--------------------|-------------|-------------------|--------------|--------------------|--------------------------|--------------------------------|---------------------|-----------------------------|
| 1            | 7.689  | 0.0118      | 11.6214 | 0.0072      | 9.3366 | 0.0061      | 90           | 0                  | 108.6351    | 0.0548            | 90           | 0                  | 790.549                  | 2.117                          | 126                 | 145                         |
| 2            | 7.6443 | 0.021       | 11.6243 | 0.0107      | 9.3392 | 0.0081      | 90           | 0                  | 108.7384    | 0.0698            | 90           | 0                  | 785.883                  | 3.523                          | 128                 | 140                         |
| 3            | 7.6361 | 0.0158      | 11.6087 | 0.0059      | 9.3308 | 0.005       | 90           | 0                  | 108.682     | 0.037             | 90           | 0                  | 783.552                  | 2.151                          | 125                 | 134                         |
| 4            | 7.6566 | 0.0105      | 11.6133 | 0.0059      | 9.3323 | 0.0053      | 90           | 0                  | 108.6541    | 0.0308            | 90           | 0                  | 786.219                  | 1.818                          | 125                 | 144                         |
| 5            | 7.6438 | 0.0078      | 11.6099 | 0.0046      | 9.3308 | 0.0042      | 90           | 0                  | 108.5843    | 0.0264            | 90           | 0                  | 784.879                  | 1.247                          | 132                 | 156                         |
| 6            | 7.6329 | 0.0058      | 11.5974 | 0.0036      | 9.314  | 0.0038      | 90           | 0                  | 108.6338    | 0.0203            | 90           | 0                  | 781.263                  | 0.991                          | 142                 | 183                         |
| 7            | 7.6285 | 0.0047      | 11.5945 | 0.0044      | 9.3112 | 0.0044      | 90           | 0                  | 108.6318    | 0.02              | 90           | 0                  | 780.398                  | 0.986                          | 131                 | 168                         |
| 8            | 7.6338 | 0.0034      | 11.5929 | 0.0038      | 9.3212 | 0.0031      | 90           | 0                  | 108.6826    | 0.0175            | 90           | 0                  | 781.443                  | 0.723                          | 136                 | 177                         |
| 9            | 7.6451 | 0.0041      | 11.5986 | 0.0046      | 9.3229 | 0.005       | 90           | 0                  | 108.7049    | 0.0188            | 90           | 0                  | 783.021                  | 0.985                          | 137                 | 180                         |
| 10           | 7.6456 | 0.0045      | 11.6119 | 0.0071      | 9.3187 | 0.0066      | 90           | 0                  | 108.7232    | 0.0258            | 90           | 0                  | 783.537                  | 1.227                          | 122                 | 145                         |
| 11           | 7.6638 | 0.0061      | 11.628  | 0.0121      | 9.3611 | 0.0092      | 90           | 0                  | 108.7387    | 0.0268            | 90           | 0                  | 789.988                  | 1.852                          | 118                 | 128                         |
| 12           | 7.6502 | 0.0053      | 11.5981 | 0.0114      | 9.3347 | 0.0075      | 90           | 0                  | 108.6654    | 0.0219            | 90           | 0                  | 784.69                   | 1.631                          | 118                 | 128                         |
| 13           | 7.6512 | 0.0074      | 11.6229 | 0.0108      | 9.3141 | 0.0097      | 90           | 0                  | 108.7184    | 0.0324            | 90           | 0                  | 784.473                  | 2.085                          | 115                 | 126                         |
| 14           | 7.6348 | 0.0068      | 11.5792 | 0.0105      | 9.319  | 0.009       | 90           | 0                  | 108.6536    | 0.0331            | 90           | 0                  | 780.57                   | 2.019                          | 114                 | 124                         |
| 15           | 7.6392 | 0.0055      | 11.5898 | 0.0093      | 9.3225 | 0.0076      | 90           | 0                  | 108.5856    | 0.0401            | 90           | 0                  | 782.335                  | 1.621                          | 117                 | 131                         |
| 16           | 7.6359 | 0.0094      | 11.6023 | 0.0154      | 9.3183 | 0.0111      | 90           | 0                  | 108.7413    | 0.0734            | 90           | 0                  | 781.776                  | 2.639                          | 106                 | 113                         |
| 17           | 7.665  | 0.0089      | 11.6175 | 0.0111      | 9.3284 | 0.0097      | 90           | 0                  | 108.7297    | 0.0766            | 90           | 0                  | 786.683                  | 2.328                          | 105                 | 117                         |
| 18           | 7.6579 | 0.0111      | 11.6055 | 0.0114      | 9.334  | 0.0101      | 90           | 0                  | 108.7232    | 0.0805            | 90           | 0                  | 785.644                  | 2.655                          | 108                 | 118                         |
| 19           | 7.6581 | 0.0081      | 11.6357 | 0.005       | 9.3904 | 0.0114      | 90           | 0                  | 108.8788    | 0.0756            | 90           | 0                  | 791.737                  | 1.627                          | 135                 | 159                         |
| 20           | 7.6392 | 0.0094      | 11.5998 | 0.0054      | 9.3672 | 0.0218      | 90           | 0                  | 108.9196    | 0.1174            | 90           | 0                  | 785.22                   | 2.327                          | 133                 | 148                         |



# COMMUNICATION

|    |        |        |         |        |        |        |    |   |          |        |    |   |         |       |     |     |
|----|--------|--------|---------|--------|--------|--------|----|---|----------|--------|----|---|---------|-------|-----|-----|
| 21 | 7.6678 | 0.0095 | 11.6454 | 0.0076 | 9.3654 | 0.0206 | 90 | 0 | 108.8593 | 0.0957 | 90 | 0 | 791.385 | 2.595 | 129 | 157 |
| 22 | 7.6387 | 0.0054 | 11.6069 | 0.0062 | 9.3251 | 0.0107 | 90 | 0 | 108.7473 | 0.0422 | 90 | 0 | 782.909 | 1.567 | 135 | 178 |
| 23 | 7.6428 | 0.0035 | 11.6229 | 0.0038 | 9.3236 | 0.0064 | 90 | 0 | 108.7118 | 0.0208 | 90 | 0 | 784.45  | 0.999 | 145 | 193 |
| 24 | 7.6519 | 0.0047 | 11.6286 | 0.0061 | 9.3517 | 0.0089 | 90 | 0 | 108.6808 | 0.0238 | 90 | 0 | 788.276 | 1.411 | 136 | 186 |
| 25 | 7.6302 | 0.0047 | 11.5979 | 0.007  | 9.3099 | 0.0077 | 90 | 0 | 108.7529 | 0.0173 | 90 | 0 | 780.14  | 1.363 | 130 | 161 |
| 26 | 7.6332 | 0.0043 | 11.5952 | 0.0077 | 9.3213 | 0.0065 | 90 | 0 | 108.7832 | 0.0147 | 90 | 0 | 781.077 | 1.254 | 150 | 174 |
| 27 | 7.6545 | 0.0051 | 11.6545 | 0.0125 | 9.3547 | 0.0073 | 90 | 0 | 108.7486 | 0.0204 | 90 | 0 | 790.251 | 1.654 | 135 | 162 |
| 28 | 7.6444 | 0.0053 | 11.6548 | 0.0181 | 9.334  | 0.0074 | 90 | 0 | 108.787  | 0.0214 | 90 | 0 | 787.297 | 1.882 | 124 | 142 |
| 29 | 7.6605 | 0.0035 | 11.6008 | 0.0119 | 9.3546 | 0.0044 | 90 | 0 | 108.7357 | 0.0139 | 90 | 0 | 787.272 | 1.271 | 132 | 153 |
| 30 | 7.6406 | 0.0035 | 11.5879 | 0.0117 | 9.3299 | 0.0049 | 90 | 0 | 108.7948 | 0.0121 | 90 | 0 | 782.015 | 1.394 | 133 | 144 |
| 31 | 7.6464 | 0.0057 | 11.5995 | 0.0149 | 9.3298 | 0.0072 | 90 | 0 | 108.7788 | 0.0181 | 90 | 0 | 783.45  | 1.917 | 126 | 149 |
| 32 | 7.6461 | 0.0044 | 11.5936 | 0.0101 | 9.3345 | 0.0056 | 90 | 0 | 108.819  | 0.0158 | 90 | 0 | 783.231 | 1.425 | 126 | 148 |
| 33 | 7.6635 | 0.0049 | 11.6189 | 0.0101 | 9.3603 | 0.0052 | 90 | 0 | 108.7991 | 0.0272 | 90 | 0 | 788.987 | 1.34  | 120 | 136 |
| 34 | 7.6715 | 0.0057 | 11.623  | 0.0111 | 9.3666 | 0.0066 | 90 | 0 | 108.8816 | 0.0402 | 90 | 0 | 790.237 | 1.59  | 119 | 133 |
| 35 | 7.6602 | 0.0044 | 11.6252 | 0.0047 | 9.369  | 0.0047 | 90 | 0 | 108.9175 | 0.0305 | 90 | 0 | 789.257 | 0.916 | 140 | 166 |
| 36 | 7.6495 | 0.0103 | 11.6043 | 0.0085 | 9.361  | 0.0121 | 90 | 0 | 108.9436 | 0.1039 | 90 | 0 | 785.947 | 1.783 | 118 | 138 |
| 37 | 7.6669 | 0.006  | 11.6358 | 0.0072 | 9.3651 | 0.0113 | 90 | 0 | 108.5387 | 0.0672 | 90 | 0 | 792.116 | 2.142 | 122 | 139 |
| 38 | 7.6558 | 0.0057 | 11.6463 | 0.0071 | 9.358  | 0.0096 | 90 | 0 | 108.8018 | 0.0613 | 90 | 0 | 789.853 | 1.886 | 125 | 145 |
| 39 | 7.6637 | 0.0059 | 11.6402 | 0.0069 | 9.3658 | 0.0083 | 90 | 0 | 108.6387 | 0.0465 | 90 | 0 | 791.675 | 1.754 | 132 | 147 |
| 40 | 7.6343 | 0.0032 | 11.5955 | 0.0039 | 9.323  | 0.0041 | 90 | 0 | 108.6885 | 0.022  | 90 | 0 | 781.791 | 0.876 | 143 | 172 |
| 41 | 7.6364 | 0.0058 | 11.5987 | 0.0071 | 9.3277 | 0.0065 | 90 | 0 | 108.694  | 0.0308 | 90 | 0 | 782.584 | 1.44  | 136 | 172 |
| 42 | 7.6323 | 0.0045 | 11.5735 | 0.0073 | 9.3136 | 0.0048 | 90 | 0 | 108.6735 | 0.021  | 90 | 0 | 779.383 | 1.052 | 135 | 203 |
| 43 | 7.6381 | 0.0029 | 11.6021 | 0.007  | 9.3303 | 0.0031 | 90 | 0 | 108.6947 | 0.0101 | 90 | 0 | 783.206 | 0.846 | 152 | 202 |
| 44 | 7.6585 | 0.0043 | 11.6618 | 0.0142 | 9.362  | 0.0047 | 90 | 0 | 108.6948 | 0.0124 | 90 | 0 | 792.021 | 1.408 | 139 | 176 |
| 45 | 7.6194 | 0.0034 | 11.5343 | 0.012  | 9.305  | 0.0041 | 90 | 0 | 108.7466 | 0.0105 | 90 | 0 | 774.381 | 1.245 | 136 | 177 |
| 46 | 7.6558 | 0.0024 | 11.638  | 0.0085 | 9.3513 | 0.0027 | 90 | 0 | 108.6618 | 0.0086 | 90 | 0 | 789.383 | 0.893 | 135 | 164 |
| 47 | 7.6467 | 0.0041 | 11.5976 | 0.0119 | 9.346  | 0.0045 | 90 | 0 | 108.6842 | 0.0133 | 90 | 0 | 785.152 | 1.437 | 137 | 157 |
| 48 | 7.6474 | 0.0043 | 11.6122 | 0.0114 | 9.3464 | 0.0053 | 90 | 0 | 108.6235 | 0.016  | 90 | 0 | 786.528 | 1.378 | 125 | 148 |
| 49 | 7.645  | 0.0034 | 11.6067 | 0.0076 | 9.3455 | 0.0046 | 90 | 0 | 108.6439 | 0.0135 | 90 | 0 | 785.735 | 1.067 | 122 | 139 |
| 50 | 7.6521 | 0.0044 | 11.612  | 0.0085 | 9.3613 | 0.0066 | 90 | 0 | 108.6278 | 0.0209 | 90 | 0 | 788.233 | 1.36  | 125 | 141 |

# COMMUNICATION

|    |         |        |         |        |         |        |    |   |          |        |    |   |          |       |     |     |
|----|---------|--------|---------|--------|---------|--------|----|---|----------|--------|----|---|----------|-------|-----|-----|
| 51 | 7.6403  | 0.0058 | 11.5875 | 0.0101 | 9.3545  | 0.0102 | 90 | 0 | 108.5378 | 0.0429 | 90 | 0 | 785.203  | 1.766 | 112 | 127 |
| 52 | 7.656   | 0.0045 | 11.6321 | 0.0078 | 9.3453  | 0.01   | 90 | 0 | 108.6002 | 0.0475 | 90 | 0 | 788.784  | 1.539 | 118 | 129 |
| 53 | 7.643   | 0.005  | 11.6038 | 0.0075 | 9.3537  | 0.013  | 90 | 0 | 108.5078 | 0.0788 | 90 | 0 | 786.658  | 2.123 | 110 | 128 |
| 54 | 7.6397  | 0.0042 | 11.601  | 0.0053 | 9.3172  | 0.0119 | 90 | 0 | 108.7702 | 0.0632 | 90 | 0 | 781.847  | 1.83  | 130 | 147 |
| 55 | 7.6588  | 0.0073 | 11.6197 | 0.0041 | 9.3356  | 0.0044 | 90 | 0 | 108.6534 | 0.0318 | 90 | 0 | 787.164  | 1.136 | 138 | 180 |
| 56 | 7.6383  | 0.0049 | 11.5842 | 0.0042 | 9.3184  | 0.0039 | 90 | 0 | 108.7315 | 0.0218 | 90 | 0 | 780.848  | 0.944 | 138 | 181 |
| 57 | 7.6445  | 0.0041 | 11.5973 | 0.0036 | 9.3237  | 0.0038 | 90 | 0 | 108.651  | 0.0186 | 90 | 0 | 783.189  | 0.821 | 143 | 175 |
| 58 | 7.6436  | 0.0033 | 11.5827 | 0.0033 | 9.3228  | 0.0035 | 90 | 0 | 108.7188 | 0.0155 | 90 | 0 | 781.721  | 0.702 | 141 | 184 |
| 59 | 7.6528  | 0.0032 | 11.5956 | 0.0044 | 9.336   | 0.0042 | 90 | 0 | 108.7622 | 0.0149 | 90 | 0 | 784.438  | 0.798 | 138 | 179 |
| 60 | 7.6428  | 0.0026 | 11.5859 | 0.0062 | 9.3234  | 0.0032 | 90 | 0 | 108.7329 | 0.0111 | 90 | 0 | 781.84   | 0.81  | 144 | 184 |
| 61 | 7.6687  | 0.0035 | 11.6542 | 0.0102 | 9.3527  | 0.0054 | 90 | 0 | 108.7408 | 0.0151 | 90 | 0 | 791.557  | 1.154 | 136 | 170 |
| 62 | 7.6443  | 0.0028 | 11.5805 | 0.0075 | 9.3262  | 0.0038 | 90 | 0 | 108.691  | 0.0103 | 90 | 0 | 782.059  | 0.913 | 136 | 164 |
| 63 | 7.6479  | 0.0033 | 11.5976 | 0.0075 | 9.3321  | 0.0039 | 90 | 0 | 108.743  | 0.0126 | 90 | 0 | 783.842  | 1.04  | 125 | 153 |
| 64 | 7.6643  | 0.0042 | 11.6195 | 0.0097 | 9.3484  | 0.0051 | 90 | 0 | 108.7375 | 0.0224 | 90 | 0 | 788.396  | 1.313 | 122 | 138 |
| 65 | 9.998   | 0.0054 | 11.6004 | 0.0076 | 13.8396 | 0.007  | 90 | 0 | 101.9114 | 0.0162 | 90 | 0 | 1570.564 | 2.284 | 125 | 146 |
| 66 | 9.9772  | 0.0061 | 11.5713 | 0.0069 | 13.8118 | 0.0071 | 90 | 0 | 102.0003 | 0.0222 | 90 | 0 | 1552.612 | 2.121 | 138 | 157 |
| 67 | 10.0149 | 0.0064 | 11.6071 | 0.007  | 13.8658 | 0.0061 | 90 | 0 | 101.7732 | 0.0363 | 90 | 0 | 1577.9   | 2.112 | 133 | 153 |
| 68 | 9.9768  | 0.0091 | 11.5723 | 0.0038 | 13.8369 | 0.0069 | 90 | 0 | 101.8903 | 0.0211 | 90 | 0 | 1572.372 | 2.132 | 137 | 169 |
| 69 | 9.9996  | 0.0102 | 11.5721 | 0.0059 | 13.8527 | 0.0054 | 90 | 0 | 101.8385 | 0.0298 | 90 | 0 | 1569.667 | 2.42  | 136 | 163 |
| 70 | 9.9981  | 0.0107 | 11.5923 | 0.0077 | 13.8144 | 0.0158 | 90 | 0 | 101.8387 | 0.0757 | 90 | 0 | 1567.049 | 4.321 | 118 | 141 |
| 71 | 9.9957  | 0.0042 | 11.5811 | 0.0063 | 13.8272 | 0.0088 | 90 | 0 | 101.8609 | 0.0159 | 90 | 0 | 1567.897 | 2.371 | 137 | 178 |
| 72 | 10.0101 | 0.0069 | 11.5852 | 0.0096 | 13.8724 | 0.0109 | 90 | 0 | 102.0223 | 0.0277 | 90 | 0 | 1574.264 | 2.936 | 123 | 156 |
| 73 | 9.9573  | 0.0059 | 11.5521 | 0.0069 | 13.8168 | 0.0072 | 90 | 0 | 102.007  | 0.0232 | 90 | 0 | 1554.632 | 2.301 | 137 | 154 |
| 74 | 9.9835  | 0.0067 | 11.5747 | 0.0059 | 13.8189 | 0.0067 | 90 | 0 | 101.9107 | 0.0187 | 90 | 0 | 1561.469 | 2.248 | 135 | 159 |
| 75 | 9.9833  | 0.0093 | 11.6161 | 0.0044 | 13.8411 | 0.0082 | 90 | 0 | 101.9669 | 0.0385 | 90 | 0 | 1572.46  | 2.544 | 133 | 152 |
| 84 | 9.9857  | 0.0072 | 11.5854 | 0.0089 | 13.8456 | 0.0136 | 90 | 0 | 102.0012 | 0.0329 | 90 | 0 | 1563.072 | 3.042 | 139 | 159 |
| 77 | 9.9728  | 0.0071 | 11.5823 | 0.0048 | 13.8269 | 0.0066 | 90 | 0 | 101.9903 | 0.0201 | 90 | 0 | 1562.272 | 2.222 | 136 | 170 |
| 78 | 9.9963  | 0.0057 | 11.5862 | 0.0039 | 13.8428 | 0.0052 | 90 | 0 | 102.0803 | 0.0132 | 90 | 0 | 1567.758 | 1.751 | 137 | 166 |
| 79 | 9.9901  | 0.0074 | 11.5773 | 0.0052 | 13.8193 | 0.007  | 90 | 0 | 102.0661 | 0.0205 | 90 | 0 | 1563.011 | 2.317 | 133 | 161 |
| 80 | 9.9811  | 0.0045 | 11.5893 | 0.005  | 13.8331 | 0.0056 | 90 | 0 | 102.0325 | 0.0176 | 90 | 0 | 1564.973 | 1.789 | 144 | 178 |

# COMMUNICATION

|     |         |        |         |        |         |        |    |   |          |        |    |   |          |       |     |     |
|-----|---------|--------|---------|--------|---------|--------|----|---|----------|--------|----|---|----------|-------|-----|-----|
| 81  | 9.9726  | 0.0036 | 11.5718 | 0.0037 | 13.8167 | 0.005  | 90 | 0 | 102.0046 | 0.019  | 90 | 0 | 1559.589 | 1.423 | 129 | 151 |
| 82  | 10.0049 | 0.0064 | 11.6245 | 0.0088 | 13.8729 | 0.0094 | 90 | 0 | 102.0531 | 0.0357 | 90 | 0 | 1577.873 | 2.855 | 159 | 187 |
| 83  | 9.9856  | 0.0037 | 11.5788 | 0.0045 | 13.8482 | 0.0064 | 90 | 0 | 102.0052 | 0.0186 | 90 | 0 | 1566.129 | 1.66  | 147 | 179 |
| 84  | 9.9834  | 0.0068 | 11.5694 | 0.0087 | 13.8526 | 0.0132 | 90 | 0 | 102.0007 | 0.0339 | 90 | 0 | 1565.043 | 3.082 | 139 | 166 |
| 85  | 10.0045 | 0.0055 | 11.6057 | 0.0077 | 13.8422 | 0.0128 | 90 | 0 | 102.094  | 0.0235 | 90 | 0 | 1571.536 | 2.555 | 134 | 160 |
| 86  | 9.9986  | 0.0053 | 11.5835 | 0.0058 | 13.879  | 0.0147 | 90 | 0 | 102.1762 | 0.0244 | 90 | 0 | 1571.287 | 2.719 | 133 | 154 |
| 87  | 10.0009 | 0.0079 | 11.5825 | 0.0077 | 13.8416 | 0.0079 | 90 | 0 | 101.8892 | 0.0189 | 90 | 0 | 1568.992 | 2.765 | 133 | 154 |
| 88  | 9.9912  | 0.0089 | 11.5756 | 0.0083 | 13.8294 | 0.0088 | 90 | 0 | 101.8364 | 0.0212 | 90 | 0 | 1566.809 | 3.055 | 139 | 169 |
| 89  | 9.9997  | 0.0085 | 11.5674 | 0.0069 | 13.8523 | 0.0066 | 90 | 0 | 101.8731 | 0.0239 | 90 | 0 | 1567.157 | 2.715 | 127 | 139 |
| 90  | 9.9833  | 0.0092 | 11.5994 | 0.0081 | 13.8669 | 0.0202 | 90 | 0 | 101.9392 | 0.0799 | 90 | 0 | 1571.045 | 4.079 | 121 | 135 |
| 91  | 10.0045 | 0.0104 | 11.6061 | 0.006  | 13.868  | 0.009  | 90 | 0 | 101.7982 | 0.053  | 90 | 0 | 1576.246 | 3.424 | 134 | 161 |
| 92  | 9.9741  | 0.0096 | 11.5741 | 0.0048 | 13.8217 | 0.0094 | 90 | 0 | 101.8921 | 0.0696 | 90 | 0 | 1561.35  | 3.313 | 132 | 181 |
| 93  | 9.9859  | 0.0074 | 11.5832 | 0.0043 | 13.8295 | 0.0093 | 90 | 0 | 101.9869 | 0.0656 | 90 | 0 | 1564.759 | 2.827 | 137 | 167 |
| 94  | 9.9894  | 0.0071 | 11.5789 | 0.005  | 13.8162 | 0.01   | 90 | 0 | 101.9119 | 0.0383 | 90 | 0 | 1563.66  | 2.945 | 139 | 170 |
| 95  | 9.9702  | 0.004  | 11.5653 | 0.0035 | 13.8045 | 0.0075 | 90 | 0 | 101.9339 | 0.0311 | 90 | 0 | 1557.377 | 1.846 | 143 | 192 |
| 96  | 9.9794  | 0.0042 | 11.5724 | 0.0039 | 13.8155 | 0.0091 | 90 | 0 | 101.9521 | 0.0283 | 90 | 0 | 1560.903 | 2.108 | 115 | 219 |
| 97  | 9.9631  | 0.004  | 11.5615 | 0.0045 | 13.7935 | 0.0076 | 90 | 0 | 101.951  | 0.0166 | 90 | 0 | 1554.404 | 1.906 | 129 | 220 |
| 98  | 9.9785  | 0.003  | 11.5739 | 0.0033 | 13.8182 | 0.006  | 90 | 0 | 101.9404 | 0.0114 | 90 | 0 | 1561.338 | 1.406 | 149 | 218 |
| 99  | 9.973   | 0.0027 | 11.5672 | 0.0036 | 13.8241 | 0.0054 | 90 | 0 | 101.9304 | 0.01   | 90 | 0 | 1560.291 | 1.239 | 136 | 210 |
| 100 | 9.9755  | 0.0046 | 11.5809 | 0.0063 | 13.8252 | 0.0083 | 90 | 0 | 101.8909 | 0.0157 | 90 | 0 | 1562.895 | 2.171 | 137 | 180 |
| 101 | 10.0151 | 0.0066 | 11.5852 | 0.0096 | 13.8724 | 0.0109 | 90 | 0 | 102.0223 | 0.0277 | 90 | 0 | 1574.271 | 2.936 | 133 | 155 |
| 102 | 9.9583  | 0.0056 | 11.553  | 0.0069 | 13.8148 | 0.0076 | 90 | 0 | 102.0016 | 0.0231 | 90 | 0 | 1554.628 | 2.301 | 132 | 153 |
| 103 | 9.9735  | 0.0062 | 11.5745 | 0.0058 | 13.8239 | 0.007  | 90 | 0 | 101.9089 | 0.0186 | 90 | 0 | 1561.479 | 2.248 | 135 | 163 |
| 104 | 10.0014 | 0.0077 | 11.5725 | 0.007  | 13.8434 | 0.0078 | 90 | 0 | 101.8696 | 0.0188 | 90 | 0 | 1567.99  | 2.75  | 133 | 149 |
| 105 | 9.9911  | 0.009  | 11.5656 | 0.0082 | 13.8274 | 0.0089 | 90 | 0 | 101.8371 | 0.0213 | 90 | 0 | 1563.809 | 3.075 | 129 | 155 |
| 106 | 9.996   | 0.0088 | 11.5669 | 0.006  | 13.8416 | 0.0067 | 90 | 0 | 101.8711 | 0.0229 | 90 | 0 | 1566.184 | 2.615 | 126 | 139 |
| 107 | 9.9853  | 0.0112 | 11.5756 | 0.0061 | 13.8444 | 0.008  | 90 | 0 | 101.763  | 0.0289 | 90 | 0 | 1566.613 | 3.109 | 135 | 155 |
| 108 | 9.9896  | 0.0092 | 11.5691 | 0.0049 | 13.85   | 0.0054 | 90 | 0 | 101.8285 | 0.0308 | 90 | 0 | 1566.667 | 2.4   | 135 | 163 |
| 109 | 9.9832  | 0.003  | 11.579  | 0.0035 | 13.8583 | 0.0148 | 90 | 0 | 102.11   | 0.0223 | 90 | 0 | 1566.304 | 2.286 | 147 | 195 |
| 110 | 9.9971  | 0.005  | 11.5943 | 0.0041 | 13.8861 | 0.0302 | 90 | 0 | 102.1617 | 0.0745 | 90 | 0 | 1573.406 | 3.935 | 118 | 202 |

# COMMUNICATION

|     |         |        |         |        |         |        |    |   |          |        |    |   |          |       |     |     |
|-----|---------|--------|---------|--------|---------|--------|----|---|----------|--------|----|---|----------|-------|-----|-----|
| 111 | 9.9818  | 0.0065 | 11.5949 | 0.005  | 13.8308 | 0.0229 | 90 | 0 | 101.8942 | 0.0634 | 90 | 0 | 1566.367 | 3.643 | 121 | 219 |
| 112 | 9.9799  | 0.0044 | 11.5885 | 0.0041 | 13.8343 | 0.0103 | 90 | 0 | 101.9467 | 0.0278 | 90 | 0 | 1565.327 | 2.116 | 151 | 228 |
| 113 | 9.9903  | 0.005  | 11.6011 | 0.0041 | 13.8574 | 0.0101 | 90 | 0 | 101.9905 | 0.024  | 90 | 0 | 1571.015 | 2.219 | 121 | 254 |
| 114 | 9.9628  | 0.0071 | 11.5731 | 0.0055 | 13.8229 | 0.0122 | 90 | 0 | 101.9534 | 0.0331 | 90 | 0 | 1559.226 | 2.827 | 104 | 233 |
| 115 | 9.965   | 0.0053 | 11.5719 | 0.0057 | 13.8158 | 0.0074 | 90 | 0 | 101.9993 | 0.0211 | 90 | 0 | 1558.352 | 2.087 | 118 | 233 |
| 116 | 9.9635  | 0.0051 | 11.5561 | 0.0077 | 13.8142 | 0.0073 | 90 | 0 | 102.0217 | 0.017  | 90 | 0 | 1555.671 | 2.318 | 101 | 234 |
| 117 | 9.9814  | 0.0042 | 11.5857 | 0.0068 | 13.8428 | 0.0051 | 90 | 0 | 102.0322 | 0.0126 | 90 | 0 | 1565.626 | 1.65  | 136 | 212 |
| 118 | 9.9868  | 0.0056 | 11.59   | 0.0088 | 13.8526 | 0.0062 | 90 | 0 | 102.0379 | 0.0104 | 90 | 0 | 1568.134 | 2.111 | 139 | 210 |
| 119 | 9.9575  | 0.0046 | 11.5553 | 0.0113 | 13.8107 | 0.0072 | 90 | 0 | 102.0059 | 0.0111 | 90 | 0 | 1554.326 | 2.764 | 100 | 210 |
| 120 | 9.9856  | 0.0036 | 11.5704 | 0.0081 | 13.848  | 0.005  | 90 | 0 | 102.0068 | 0.0102 | 90 | 0 | 1564.968 | 1.909 | 134 | 201 |
| 121 | 9.9688  | 0.004  | 11.5692 | 0.0088 | 13.8322 | 0.0061 | 90 | 0 | 102.0087 | 0.0138 | 90 | 0 | 1560.368 | 2.216 | 127 | 197 |
| 122 | 9.9724  | 0.0052 | 11.5531 | 0.0088 | 13.8381 | 0.0074 | 90 | 0 | 102.0115 | 0.017  | 90 | 0 | 1559.412 | 2.553 | 111 | 203 |
| 123 | 9.9634  | 0.0033 | 11.5434 | 0.0052 | 13.8231 | 0.0055 | 90 | 0 | 101.9681 | 0.0125 | 90 | 0 | 1555.255 | 1.579 | 138 | 184 |
| 124 | 9.9928  | 0.0038 | 11.5892 | 0.0054 | 13.8855 | 0.0064 | 90 | 0 | 102.0335 | 0.0132 | 90 | 0 | 1572.721 | 1.682 | 140 | 185 |
| 125 | 9.9721  | 0.0033 | 11.5628 | 0.0045 | 13.8385 | 0.0096 | 90 | 0 | 102.0391 | 0.0168 | 90 | 0 | 1560.552 | 1.925 | 128 | 188 |
| 126 | 9.9652  | 0.0039 | 11.5485 | 0.0054 | 13.7791 | 0.0155 | 90 | 0 | 101.9818 | 0.0235 | 90 | 0 | 1551.191 | 2.402 | 131 | 195 |
| 127 | 9.9891  | 0.0095 | 11.5859 | 0.0049 | 13.8328 | 0.0065 | 90 | 0 | 102.0168 | 0.0246 | 90 | 0 | 1565.812 | 2.681 | 144 | 178 |
| 128 | 9.9788  | 0.0121 | 11.5662 | 0.0069 | 13.8081 | 0.0089 | 90 | 0 | 101.9476 | 0.0278 | 90 | 0 | 1559.165 | 3.48  | 117 | 200 |
| 129 | 9.9832  | 0.0081 | 11.5995 | 0.0055 | 13.8397 | 0.0069 | 90 | 0 | 102.0139 | 0.0176 | 90 | 0 | 1567.542 | 2.505 | 152 | 222 |
| 130 | 9.994   | 0.0065 | 11.5721 | 0.0045 | 13.8249 | 0.0058 | 90 | 0 | 102.0526 | 0.0126 | 90 | 0 | 1563.627 | 1.986 | 123 | 237 |
| 131 | 9.9743  | 0.0094 | 11.5795 | 0.0062 | 13.816  | 0.0091 | 90 | 0 | 101.9978 | 0.0211 | 90 | 0 | 1560.863 | 2.827 | 118 | 226 |
| 132 | 9.968   | 0.0065 | 11.5703 | 0.0067 | 13.8068 | 0.0074 | 90 | 0 | 101.9935 | 0.0159 | 90 | 0 | 1557.618 | 2.202 | 127 | 268 |
| 133 | 9.9724  | 0.0037 | 11.5452 | 0.0073 | 13.812  | 0.0048 | 90 | 0 | 101.9817 | 0.0103 | 90 | 0 | 1555.577 | 1.722 | 154 | 283 |
| 134 | 10.0145 | 0.0041 | 11.603  | 0.0111 | 13.8642 | 0.0057 | 90 | 0 | 102.0539 | 0.0123 | 90 | 0 | 1575.471 | 2.231 | 128 | 247 |
| 135 | 9.9797  | 0.0042 | 11.5548 | 0.0098 | 13.8186 | 0.0054 | 90 | 0 | 101.9782 | 0.0083 | 90 | 0 | 1558.772 | 2.395 | 119 | 225 |
| 136 | 10.0015 | 0.0038 | 11.5514 | 0.0104 | 13.8501 | 0.0054 | 90 | 0 | 102.04   | 0.0088 | 90 | 0 | 1564.917 | 2.275 | 117 | 219 |
| 137 | 9.9813  | 0.0039 | 11.553  | 0.0077 | 13.8278 | 0.0049 | 90 | 0 | 102.0189 | 0.0115 | 90 | 0 | 1559.578 | 1.972 | 104 | 195 |
| 138 | 9.9846  | 0.0036 | 11.555  | 0.0078 | 13.8292 | 0.0057 | 90 | 0 | 102.0426 | 0.0146 | 90 | 0 | 1560.396 | 1.952 | 111 | 200 |
| 139 | 9.9743  | 0.0035 | 11.5436 | 0.0053 | 13.8176 | 0.0045 | 90 | 0 | 102.039  | 0.0145 | 90 | 0 | 1555.95  | 1.545 | 147 | 177 |
| 140 | 9.984   | 0.0042 | 11.5577 | 0.0046 | 13.8267 | 0.0045 | 90 | 0 | 102.0435 | 0.0165 | 90 | 0 | 1560.368 | 1.568 | 152 | 189 |

# COMMUNICATION

|     |         |        |         |        |         |        |    |   |          |        |    |   |          |       |     |     |
|-----|---------|--------|---------|--------|---------|--------|----|---|----------|--------|----|---|----------|-------|-----|-----|
| 141 | 9.9801  | 0.0083 | 11.5492 | 0.0065 | 13.8194 | 0.008  | 90 | 0 | 102.0826 | 0.0338 | 90 | 0 | 1557.572 | 2.658 | 140 | 180 |
| 142 | 9.9811  | 0.0078 | 11.5629 | 0.0045 | 13.8277 | 0.0061 | 90 | 0 | 102.0619 | 0.0248 | 90 | 0 | 1560.618 | 2.265 | 151 | 179 |
| 143 | 10.0094 | 0.0109 | 11.5656 | 0.0051 | 13.8431 | 0.0077 | 90 | 0 | 102.1235 | 0.0372 | 90 | 0 | 1566.8   | 2.861 | 138 | 171 |
| 144 | 9.9504  | 0.0172 | 11.5485 | 0.0061 | 13.8095 | 0.0094 | 90 | 0 | 101.998  | 0.0562 | 90 | 0 | 1552.218 | 3.973 | 125 | 199 |
| 145 | 10.0023 | 0.0043 | 11.5888 | 0.0043 | 13.8569 | 0.0103 | 90 | 0 | 101.908  | 0.0336 | 90 | 0 | 1571.666 | 2.337 | 123 | 216 |
| 146 | 10.017  | 0.0034 | 11.6042 | 0.0036 | 13.8678 | 0.0078 | 90 | 0 | 101.8924 | 0.0218 | 90 | 0 | 1577.378 | 1.721 | 130 | 231 |
| 147 | 9.9669  | 0.0052 | 11.5589 | 0.0057 | 13.8137 | 0.0108 | 90 | 0 | 101.9386 | 0.0232 | 90 | 0 | 1557.005 | 2.434 | 114 | 241 |
| 148 | 9.9814  | 0.0039 | 11.5666 | 0.0052 | 13.8366 | 0.0075 | 90 | 0 | 101.9474 | 0.0119 | 90 | 0 | 1562.851 | 1.834 | 114 | 238 |
| 149 | 9.9976  | 0.0036 | 11.5969 | 0.0045 | 13.8567 | 0.0066 | 90 | 0 | 101.9172 | 0.0103 | 90 | 0 | 1571.936 | 1.656 | 141 | 238 |
| 150 | 9.9775  | 0.0032 | 11.5708 | 0.0057 | 13.8327 | 0.005  | 90 | 0 | 101.9454 | 0.0109 | 90 | 0 | 1562.366 | 1.575 | 146 | 235 |
| 151 | 9.9725  | 0.005  | 11.5495 | 0.0099 | 13.8231 | 0.0079 | 90 | 0 | 101.9833 | 0.0191 | 90 | 0 | 1557.409 | 2.479 | 117 | 205 |
| 152 | 9.9679  | 0.0032 | 11.5523 | 0.0075 | 13.8207 | 0.0049 | 90 | 0 | 101.9631 | 0.0145 | 90 | 0 | 1556.91  | 1.743 | 115 | 208 |
| 153 | 9.9682  | 0.0041 | 11.5414 | 0.0063 | 13.8184 | 0.0053 | 90 | 0 | 101.9699 | 0.0122 | 90 | 0 | 1555.199 | 1.868 | 121 | 208 |
| 154 | 9.9708  | 0.0044 | 11.5586 | 0.0063 | 13.8359 | 0.0052 | 90 | 0 | 101.9448 | 0.0117 | 90 | 0 | 1560.033 | 1.845 | 115 | 199 |
| 155 | 9.9738  | 0.0048 | 11.5568 | 0.0054 | 13.8253 | 0.0049 | 90 | 0 | 101.9057 | 0.0125 | 90 | 0 | 1559.301 | 1.763 | 141 | 177 |
| 156 | 9.989   | 0.0036 | 11.5584 | 0.0038 | 13.84   | 0.0046 | 90 | 0 | 101.8997 | 0.0128 | 90 | 0 | 1563.597 | 1.439 | 146 | 180 |
| 157 | 9.9659  | 0.0052 | 11.5525 | 0.0057 | 13.8226 | 0.0061 | 90 | 0 | 101.9412 | 0.0258 | 90 | 0 | 1556.982 | 1.951 | 122 | 185 |
| 158 | 9.9929  | 0.006  | 11.5628 | 0.0048 | 13.8568 | 0.0062 | 90 | 0 | 101.7539 | 0.0432 | 90 | 0 | 1567.519 | 2.024 | 125 | 200 |
| 159 | 9.9668  | 0.0072 | 11.5509 | 0.0046 | 13.8278 | 0.0079 | 90 | 0 | 101.9624 | 0.0543 | 90 | 0 | 1557.352 | 2.643 | 133 | 192 |
| 160 | 9.9994  | 0.0077 | 11.571  | 0.0055 | 13.8556 | 0.012  | 90 | 0 | 101.7837 | 0.0536 | 90 | 0 | 1569.35  | 3.347 | 128 | 193 |
| 161 | 9.9931  | 0.0062 | 11.5678 | 0.0045 | 13.8431 | 0.0111 | 90 | 0 | 101.8427 | 0.0471 | 90 | 0 | 1566.169 | 2.837 | 136 | 163 |
| 162 | 9.9806  | 0.0053 | 11.5593 | 0.005  | 13.8078 | 0.0106 | 90 | 0 | 101.9881 | 0.0378 | 90 | 0 | 1558.247 | 2.594 | 140 | 180 |
| 163 | 9.9698  | 0.0076 | 11.5597 | 0.0048 | 13.8275 | 0.0107 | 90 | 0 | 101.9428 | 0.0456 | 90 | 0 | 1559.092 | 2.626 | 124 | 184 |
| 164 | 9.9725  | 0.0082 | 11.5612 | 0.0046 | 13.8408 | 0.0088 | 90 | 0 | 102.0197 | 0.0359 | 90 | 0 | 1560.78  | 2.546 | 154 | 184 |
| 165 | 9.971   | 0.0078 | 11.5562 | 0.0042 | 13.8356 | 0.0072 | 90 | 0 | 102.0638 | 0.0334 | 90 | 0 | 1559.018 | 2.201 | 151 | 175 |
| 166 | 9.9675  | 0.0084 | 11.5606 | 0.0048 | 13.8395 | 0.0069 | 90 | 0 | 102.0638 | 0.0245 | 90 | 0 | 1559.496 | 2.394 | 117 | 205 |
| 167 | 9.9772  | 0.0079 | 11.5675 | 0.0058 | 13.8419 | 0.0074 | 90 | 0 | 102.0538 | 0.0198 | 90 | 0 | 1562.288 | 2.556 | 101 | 214 |
| 168 | 9.974   | 0.0052 | 11.5473 | 0.0037 | 13.8183 | 0.0052 | 90 | 0 | 102.0147 | 0.0129 | 90 | 0 | 1556.63  | 1.662 | 121 | 212 |
| 169 | 10.0042 | 0.0082 | 11.5544 | 0.0071 | 13.8489 | 0.0082 | 90 | 0 | 101.9661 | 0.0221 | 90 | 0 | 1566.04  | 2.806 | 107 | 200 |
| 170 | 9.9823  | 0.0045 | 11.5598 | 0.0045 | 13.8318 | 0.0056 | 90 | 0 | 101.9968 | 0.0159 | 90 | 0 | 1561.231 | 1.753 | 109 | 229 |

# COMMUNICATION

|     |         |        |         |        |         |        |    |   |          |        |    |   |          |       |     |     |
|-----|---------|--------|---------|--------|---------|--------|----|---|----------|--------|----|---|----------|-------|-----|-----|
| 171 | 9.9895  | 0.0031 | 11.5618 | 0.0032 | 13.8462 | 0.0042 | 90 | 0 | 102.0097 | 0.0149 | 90 | 0 | 1564.193 | 1.227 | 128 | 199 |
| 172 | 9.957   | 0.0042 | 11.5371 | 0.0056 | 13.791  | 0.0057 | 90 | 0 | 102.0097 | 0.022  | 90 | 0 | 1549.575 | 1.8   | 144 | 223 |
| 173 | 9.9706  | 0.0037 | 11.5477 | 0.0048 | 13.8191 | 0.0062 | 90 | 0 | 101.9806 | 0.0202 | 90 | 0 | 1556.439 | 1.658 | 124 | 209 |
| 174 | 9.9767  | 0.0034 | 11.55   | 0.0041 | 13.8519 | 0.0067 | 90 | 0 | 102.0108 | 0.0153 | 90 | 0 | 1561.221 | 1.551 | 144 | 184 |
| 175 | 9.9723  | 0.0036 | 11.5527 | 0.0048 | 13.802  | 0.0078 | 90 | 0 | 101.9856 | 0.0151 | 90 | 0 | 1555.425 | 1.67  | 143 | 181 |
| 176 | 10.0054 | 0.0071 | 11.5806 | 0.0088 | 13.8656 | 0.0227 | 90 | 0 | 102.1477 | 0.036  | 90 | 0 | 1570.614 | 3.908 | 150 | 179 |
| 177 | 9.9952  | 0.0045 | 11.5645 | 0.0049 | 13.8553 | 0.0147 | 90 | 0 | 102.0926 | 0.0342 | 90 | 0 | 1565.998 | 2.458 | 143 | 164 |
| 178 | 9.9931  | 0.0051 | 11.5521 | 0.0047 | 13.8571 | 0.0142 | 90 | 0 | 102.2158 | 0.0485 | 90 | 0 | 1563.452 | 2.435 | 142 | 171 |
| 179 | 9.96    | 0.0059 | 11.5375 | 0.0041 | 13.8006 | 0.0119 | 90 | 0 | 101.9717 | 0.0441 | 90 | 0 | 1551.391 | 2.437 | 140 | 171 |
| 180 | 10.0005 | 0.01   | 11.5762 | 0.0071 | 13.8583 | 0.0184 | 90 | 0 | 102.0105 | 0.0704 | 90 | 0 | 1569.225 | 4.009 | 141 | 159 |
| 181 | 9.9734  | 0.0097 | 11.5683 | 0.0048 | 13.8422 | 0.0073 | 90 | 0 | 101.8484 | 0.0398 | 90 | 0 | 1563.031 | 2.953 | 128 | 190 |
| 182 | 10.0175 | 0.0132 | 11.5945 | 0.0059 | 13.8752 | 0.0115 | 90 | 0 | 101.7069 | 0.0846 | 90 | 0 | 1578.056 | 4.328 | 118 | 200 |
| 183 | 9.9667  | 0.0082 | 11.5677 | 0.0052 | 13.806  | 0.0103 | 90 | 0 | 102.0515 | 0.0686 | 90 | 0 | 1556.639 | 3.168 | 144 | 184 |
| 184 | 9.9907  | 0.0074 | 11.5693 | 0.0055 | 13.8289 | 0.0099 | 90 | 0 | 101.8948 | 0.041  | 90 | 0 | 1564.085 | 3.015 | 124 | 194 |
| 185 | 9.9828  | 0.0048 | 11.5699 | 0.0046 | 13.8146 | 0.009  | 90 | 0 | 101.9711 | 0.0389 | 90 | 0 | 1560.872 | 2.264 | 110 | 219 |
| 186 | 9.9628  | 0.0032 | 11.5531 | 0.0027 | 13.796  | 0.0068 | 90 | 0 | 101.988  | 0.0219 | 90 | 0 | 1553.312 | 1.549 | 132 | 237 |
| 187 | 9.9748  | 0.0035 | 11.5666 | 0.0041 | 13.8126 | 0.0072 | 90 | 0 | 101.9264 | 0.0173 | 90 | 0 | 1559.231 | 1.712 | 128 | 231 |
| 188 | 9.9677  | 0.0028 | 11.5479 | 0.0027 | 13.8178 | 0.0057 | 90 | 0 | 101.9429 | 0.0111 | 90 | 0 | 1556.076 | 1.236 | 149 | 233 |
| 189 | 9.9699  | 0.0033 | 11.5458 | 0.004  | 13.8296 | 0.0063 | 90 | 0 | 101.9326 | 0.0106 | 90 | 0 | 1557.549 | 1.502 | 135 | 240 |
| 190 | 9.9606  | 0.0031 | 11.5452 | 0.0045 | 13.7972 | 0.0058 | 90 | 0 | 101.9462 | 0.0116 | 90 | 0 | 1552.264 | 1.442 | 148 | 194 |
| 191 | 9.9916  | 0.0036 | 11.5662 | 0.0055 | 13.8546 | 0.0056 | 90 | 0 | 101.9665 | 0.0147 | 90 | 0 | 1566.308 | 1.635 | 140 | 169 |
| 192 | 9.9608  | 0.005  | 11.5419 | 0.0061 | 13.8025 | 0.0065 | 90 | 0 | 101.9839 | 0.019  | 90 | 0 | 1552.246 | 2.06  | 137 | 154 |
| 193 | 9.9852  | 0.0062 | 11.5667 | 0.006  | 13.8341 | 0.0072 | 90 | 0 | 101.8862 | 0.0189 | 90 | 0 | 1563.528 | 2.307 | 140 | 166 |
| 194 | 9.9683  | 0.007  | 11.5578 | 0.0064 | 13.8209 | 0.0072 | 90 | 0 | 101.9169 | 0.0174 | 90 | 0 | 1558.007 | 2.505 | 135 | 161 |
| 195 | 9.9624  | 0.0076 | 11.5517 | 0.007  | 13.8148 | 0.0076 | 90 | 0 | 101.8744 | 0.0185 | 90 | 0 | 1555.825 | 2.603 | 135 | 161 |
| 196 | 10.0147 | 0.0088 | 11.5742 | 0.0061 | 13.848  | 0.0073 | 90 | 0 | 101.8969 | 0.021  | 90 | 0 | 1570.678 | 2.769 | 127 | 150 |
| 197 | 10.0151 | 0.0103 | 11.582  | 0.0054 | 13.8669 | 0.0073 | 90 | 0 | 101.7127 | 0.028  | 90 | 0 | 1574.998 | 2.965 | 140 | 161 |
| 198 | 10.022  | 0.0091 | 11.5815 | 0.0048 | 13.8694 | 0.0052 | 90 | 0 | 101.7193 | 0.031  | 90 | 0 | 1576.276 | 2.402 | 132 | 171 |
| 199 | 9.9842  | 0.0042 | 11.5768 | 0.0051 | 13.832  | 0.0209 | 90 | 0 | 102.0978 | 0.0298 | 90 | 0 | 1563.264 | 3.231 | 105 | 197 |
| 200 | 9.9888  | 0.0051 | 11.5804 | 0.0041 | 13.8562 | 0.0273 | 90 | 0 | 102.1177 | 0.0636 | 90 | 0 | 1567.104 | 3.754 | 103 | 200 |

# COMMUNICATION

|     |         |        |         |        |         |        |    |   |          |        |    |   |          |       |     |     |
|-----|---------|--------|---------|--------|---------|--------|----|---|----------|--------|----|---|----------|-------|-----|-----|
| 201 | 9.9604  | 0.0057 | 11.5552 | 0.0047 | 13.7866 | 0.0173 | 90 | 0 | 101.972  | 0.0468 | 90 | 0 | 1552.262 | 3.059 | 107 | 205 |
| 202 | 9.9711  | 0.0047 | 11.5917 | 0.0041 | 13.8108 | 0.0113 | 90 | 0 | 101.8753 | 0.0303 | 90 | 0 | 1562.108 | 2.286 | 130 | 226 |
| 203 | 9.9529  | 0.0056 | 11.5585 | 0.0046 | 13.7937 | 0.0114 | 90 | 0 | 101.9483 | 0.0271 | 90 | 0 | 1552.468 | 2.467 | 132 | 239 |
| 204 | 9.9678  | 0.0059 | 11.5788 | 0.0051 | 13.8305 | 0.0099 | 90 | 0 | 102.0067 | 0.0261 | 90 | 0 | 1561.344 | 2.382 | 120 | 223 |
| 205 | 9.9821  | 0.0053 | 11.6031 | 0.006  | 13.8598 | 0.0079 | 90 | 0 | 102.0261 | 0.0215 | 90 | 0 | 1570.052 | 2.214 | 151 | 217 |
| 206 | 9.9577  | 0.0066 | 11.5761 | 0.0067 | 13.8141 | 0.0088 | 90 | 0 | 101.9749 | 0.0214 | 90 | 0 | 1557.725 | 2.426 | 93  | 224 |
| 207 | 9.9621  | 0.0097 | 11.5739 | 0.0142 | 13.8265 | 0.0114 | 90 | 0 | 101.9737 | 0.0295 | 90 | 0 | 1559.521 | 3.588 | 142 | 200 |
| 208 | 9.9806  | 0.0052 | 11.5596 | 0.0108 | 13.8404 | 0.0062 | 90 | 0 | 102.0366 | 0.0111 | 90 | 0 | 1561.684 | 2.306 | 142 | 188 |
| 209 | 9.9931  | 0.0042 | 11.5836 | 0.0099 | 13.8594 | 0.0057 | 90 | 0 | 102.0322 | 0.0104 | 90 | 0 | 1569.062 | 2.246 | 121 | 213 |
| 210 | 9.9758  | 0.0046 | 11.5495 | 0.0087 | 13.8304 | 0.0067 | 90 | 0 | 102.012  | 0.0116 | 90 | 0 | 1558.589 | 2.313 | 135 | 182 |
| 211 | 9.9874  | 0.0039 | 11.5855 | 0.0077 | 13.8495 | 0.0056 | 90 | 0 | 102.0653 | 0.0134 | 90 | 0 | 1567.11  | 1.988 | 150 | 185 |
| 212 | 9.9626  | 0.0043 | 11.5499 | 0.0069 | 13.8064 | 0.0061 | 90 | 0 | 101.9988 | 0.0136 | 90 | 0 | 1553.962 | 2.027 | 143 | 178 |
| 213 | 9.9853  | 0.0042 | 11.5762 | 0.006  | 13.8618 | 0.0066 | 90 | 0 | 102.026  | 0.014  | 90 | 0 | 1567.143 | 1.959 | 138 | 165 |
| 214 | 9.9623  | 0.0049 | 11.5652 | 0.007  | 13.7963 | 0.0086 | 90 | 0 | 101.9923 | 0.0163 | 90 | 0 | 1554.87  | 2.28  | 135 | 163 |
| 215 | 9.9868  | 0.0027 | 11.5894 | 0.0037 | 13.8889 | 0.0076 | 90 | 0 | 102.0455 | 0.0138 | 90 | 0 | 1572.128 | 1.534 | 146 | 180 |
| 216 | 9.9972  | 0.0065 | 11.5867 | 0.0051 | 13.8978 | 0.0098 | 90 | 0 | 102.0435 | 0.0169 | 90 | 0 | 1569.157 | 1.597 | 149 | 179 |
| 217 | 10.0145 | 0.0087 | 11.5987 | 0.0041 | 13.8436 | 0.0056 | 90 | 0 | 102.0543 | 0.0249 | 90 | 0 | 1572.556 | 2.321 | 138 | 167 |
| 218 | 9.9972  | 0.0093 | 11.5939 | 0.0054 | 13.8346 | 0.0069 | 90 | 0 | 102.0161 | 0.0227 | 90 | 0 | 1568.386 | 2.676 | 146 | 175 |
| 219 | 9.9882  | 0.0083 | 11.6026 | 0.0053 | 13.8394 | 0.0068 | 90 | 0 | 102.0434 | 0.0185 | 90 | 0 | 1568.536 | 2.46  | 123 | 188 |
| 220 | 9.9731  | 0.0084 | 11.5768 | 0.0053 | 13.8134 | 0.0071 | 90 | 0 | 102.0072 | 0.0164 | 90 | 0 | 1559.957 | 2.466 | 154 | 227 |
| 221 | 9.9871  | 0.0068 | 11.5919 | 0.005  | 13.8238 | 0.0066 | 90 | 0 | 102.0326 | 0.0153 | 90 | 0 | 1565.21  | 2.1   | 121 | 212 |
| 222 | 9.9937  | 0.0067 | 11.5787 | 0.0073 | 13.8267 | 0.0075 | 90 | 0 | 101.9971 | 0.017  | 90 | 0 | 1564.994 | 2.231 | 151 | 243 |
| 223 | 9.9746  | 0.0037 | 11.5534 | 0.0074 | 13.8083 | 0.0047 | 90 | 0 | 101.9784 | 0.0105 | 90 | 0 | 1556.628 | 1.798 | 131 | 232 |
| 224 | 10.0034 | 0.0041 | 11.6055 | 0.0111 | 13.8387 | 0.0057 | 90 | 0 | 102.0032 | 0.0128 | 90 | 0 | 1571.473 | 2.142 | 163 | 198 |
| 225 | 9.9595  | 0.0047 | 11.5312 | 0.0108 | 13.7992 | 0.0058 | 90 | 0 | 101.9982 | 0.0104 | 90 | 0 | 1550.142 | 2.541 | 135 | 188 |
| 226 | 9.9723  | 0.0039 | 11.5462 | 0.0084 | 13.8047 | 0.0056 | 90 | 0 | 101.9964 | 0.0084 | 90 | 0 | 1554.789 | 2.027 | 144 | 199 |
| 227 | 9.9718  | 0.003  | 11.5599 | 0.0072 | 13.8105 | 0.004  | 90 | 0 | 102.0146 | 0.0097 | 90 | 0 | 1557.105 | 1.672 | 144 | 171 |
| 228 | 10.0006 | 0.0033 | 11.5933 | 0.0066 | 13.8351 | 0.0048 | 90 | 0 | 102.0326 | 0.0123 | 90 | 0 | 1568.806 | 1.733 | 142 | 170 |
| 229 | 10.0094 | 0.0032 | 11.599  | 0.0058 | 13.8474 | 0.0046 | 90 | 0 | 102.0481 | 0.0147 | 90 | 0 | 1572.247 | 1.577 | 132 | 151 |
| 230 | 9.9965  | 0.004  | 11.5812 | 0.0056 | 13.826  | 0.0049 | 90 | 0 | 102.0794 | 0.0193 | 90 | 0 | 1565.215 | 1.658 | 131 | 153 |

# COMMUNICATION

|     |         |        |         |        |         |        |    |   |          |        |    |   |          |       |     |     |
|-----|---------|--------|---------|--------|---------|--------|----|---|----------|--------|----|---|----------|-------|-----|-----|
| 231 | 9.9845  | 0.0035 | 11.5666 | 0.0041 | 13.8319 | 0.0077 | 90 | 0 | 101.9164 | 0.0173 | 90 | 0 | 1558.231 | 1.912 | 158 | 172 |
| 232 | 9.9715  | 0.0029 | 11.5479 | 0.0027 | 13.8211 | 0.0057 | 90 | 0 | 101.9454 | 0.0112 | 90 | 0 | 1557.098 | 1.266 | 155 | 189 |
| 233 | 9.9688  | 0.0033 | 11.5475 | 0.0049 | 13.8307 | 0.0068 | 90 | 0 | 101.9333 | 0.0109 | 90 | 0 | 1556.649 | 1.576 | 135 | 167 |
| 234 | 9.9654  | 0.0037 | 11.5397 | 0.0046 | 13.7992 | 0.0061 | 90 | 0 | 101.9513 | 0.0118 | 90 | 0 | 1557.269 | 1.492 | 148 | 188 |
| 235 | 9.9967  | 0.0058 | 11.5721 | 0.0054 | 13.8107 | 0.0144 | 90 | 0 | 101.9296 | 0.0439 | 90 | 0 | 1559.836 | 3.155 | 167 | 201 |
| 236 | 9.9947  | 0.0049 | 11.6025 | 0.0054 | 13.8409 | 0.0103 | 90 | 0 | 101.8545 | 0.0267 | 90 | 0 | 1570.805 | 2.458 | 113 | 192 |
| 237 | 10.0107 | 0.0045 | 11.6101 | 0.0101 | 13.8323 | 0.0069 | 90 | 0 | 102.0009 | 0.0119 | 90 | 0 | 1571.713 | 2.113 | 163 | 193 |
| 238 | 9.9737  | 0.0037 | 11.5826 | 0.004  | 13.8165 | 0.0072 | 90 | 0 | 101.9412 | 0.0115 | 90 | 0 | 1561.564 | 1.682 | 107 | 196 |
| 239 | 9.992   | 0.0025 | 11.6038 | 0.0034 | 13.8388 | 0.005  | 90 | 0 | 101.9161 | 0.008  | 90 | 0 | 1569.966 | 1.174 | 149 | 179 |
| 240 | 9.9685  | 0.0027 | 11.5668 | 0.0052 | 13.8095 | 0.0044 | 90 | 0 | 101.9719 | 0.0095 | 90 | 0 | 1557.654 | 1.377 | 118 | 194 |
| 241 | 9.9849  | 0.0037 | 11.5727 | 0.0076 | 13.8344 | 0.0058 | 90 | 0 | 101.9909 | 0.0144 | 90 | 0 | 1563.713 | 1.872 | 141 | 172 |
| 242 | 7.653   | 0.0029 | 11.581  | 0.0077 | 9.3363  | 0.004  | 90 | 0 | 108.7384 | 0.0106 | 90 | 0 | 783.608  | 0.929 | 130 | 159 |
| 243 | 7.6578  | 0.0033 | 11.6029 | 0.0082 | 9.3447  | 0.004  | 90 | 0 | 108.7    | 0.0133 | 90 | 0 | 786.482  | 1.077 | 127 | 152 |
| 244 | 7.6423  | 0.0041 | 11.5728 | 0.0092 | 9.3223  | 0.005  | 90 | 0 | 108.6175 | 0.0217 | 90 | 0 | 781.342  | 1.274 | 121 | 137 |
| 245 | 7.6686  | 0.0036 | 11.6024 | 0.0085 | 9.3529  | 0.0047 | 90 | 0 | 108.6115 | 0.0267 | 90 | 0 | 788.651  | 1.139 | 120 | 136 |
| 246 | 7.6669  | 0.0045 | 11.6036 | 0.0066 | 9.3441  | 0.0047 | 90 | 0 | 108.7054 | 0.0234 | 90 | 0 | 787.378  | 1.182 | 115 | 127 |
| 247 | 7.6757  | 0.0049 | 11.6192 | 0.0073 | 9.3543  | 0.0049 | 90 | 0 | 108.7633 | 0.0311 | 90 | 0 | 789.931  | 1.131 | 118 | 144 |
| 248 | 7.6222  | 0.0081 | 11.5976 | 0.0074 | 9.3287  | 0.0053 | 90 | 0 | 108.9373 | 0.0402 | 90 | 0 | 780.019  | 1.348 | 120 | 138 |
| 249 | 7.6559  | 0.0119 | 11.5935 | 0.0061 | 9.3282  | 0.0046 | 90 | 0 | 108.7237 | 0.0353 | 90 | 0 | 784.144  | 1.789 | 126 | 144 |
| 250 | 7.6712  | 0.0131 | 11.5948 | 0.0075 | 9.3375  | 0.006  | 90 | 0 | 108.7923 | 0.0396 | 90 | 0 | 786.256  | 2.23  | 111 | 136 |
| 251 | 7.6641  | 0.0152 | 11.6167 | 0.0063 | 9.3435  | 0.0064 | 90 | 0 | 108.6848 | 0.0522 | 90 | 0 | 788.018  | 2.217 | 112 | 132 |
| 252 | 7.6394  | 0.0094 | 11.6176 | 0.0058 | 9.3341  | 0.0054 | 90 | 0 | 108.5824 | 0.0354 | 90 | 0 | 785.223  | 1.574 | 122 | 138 |
| 253 | 7.6541  | 0.0054 | 11.6059 | 0.0074 | 9.3467  | 0.018  | 90 | 0 | 108.8106 | 0.0376 | 90 | 0 | 785.943  | 2.298 | 123 | 136 |
| 254 | 7.656   | 0.0043 | 11.6118 | 0.0058 | 9.364   | 0.0127 | 90 | 0 | 108.813  | 0.0351 | 90 | 0 | 787.99   | 1.8   | 123 | 140 |
| 255 | 7.6656  | 0.0045 | 11.6306 | 0.0059 | 9.3624  | 0.011  | 90 | 0 | 108.8478 | 0.0411 | 90 | 0 | 789.96   | 1.674 | 119 | 139 |
| 256 | 7.647   | 0.0036 | 11.6063 | 0.0045 | 9.3459  | 0.0066 | 90 | 0 | 108.8148 | 0.029  | 90 | 0 | 785.16   | 1.18  | 129 | 148 |
| 257 | 7.6435  | 0.0036 | 11.6086 | 0.0051 | 9.3525  | 0.0056 | 90 | 0 | 108.7603 | 0.0273 | 90 | 0 | 785.763  | 1.134 | 131 | 146 |
| 258 | 7.6432  | 0.0026 | 11.5889 | 0.0045 | 9.337   | 0.0042 | 90 | 0 | 108.7072 | 0.0227 | 90 | 0 | 783.342  | 0.858 | 131 | 148 |
| 259 | 7.6563  | 0.0052 | 11.6228 | 0.006  | 9.3565  | 0.0052 | 90 | 0 | 108.7175 | 0.0306 | 90 | 0 | 788.577  | 1.242 | 128 | 147 |
| 260 | 7.6321  | 0.003  | 11.5929 | 0.005  | 9.3352  | 0.0036 | 90 | 0 | 108.72   | 0.0151 | 90 | 0 | 782.276  | 0.846 | 130 | 155 |



# COMMUNICATION

|     |        |        |         |        |        |        |    |   |          |        |    |   |         |       |     |     |
|-----|--------|--------|---------|--------|--------|--------|----|---|----------|--------|----|---|---------|-------|-----|-----|
| 261 | 7.6347 | 0.0053 | 11.6061 | 0.0058 | 9.3317 | 0.0044 | 90 | 0 | 108.7002 | 0.0182 | 90 | 0 | 783.217 | 1.095 | 122 | 141 |
| 262 | 7.6439 | 0.0043 | 11.6181 | 0.0064 | 9.3495 | 0.004  | 90 | 0 | 108.723  | 0.014  | 90 | 0 | 786.366 | 0.993 | 129 | 154 |
| 263 | 7.6103 | 0.0051 | 11.581  | 0.0063 | 9.3081 | 0.0048 | 90 | 0 | 108.6454 | 0.021  | 90 | 0 | 777.316 | 1.12  | 125 | 149 |
| 264 | 7.673  | 0.0059 | 11.6092 | 0.007  | 9.373  | 0.0055 | 90 | 0 | 108.9314 | 0.0303 | 90 | 0 | 789.76  | 1.312 | 119 | 133 |
| 265 | 7.6488 | 0.0059 | 11.5912 | 0.0069 | 9.3545 | 0.0054 | 90 | 0 | 108.8838 | 0.043  | 90 | 0 | 784.715 | 1.166 | 121 | 144 |
| 266 | 7.6489 | 0.007  | 11.6041 | 0.0071 | 9.3528 | 0.0093 | 90 | 0 | 108.7746 | 0.0634 | 90 | 0 | 785.973 | 1.485 | 122 | 136 |
| 267 | 7.6464 | 0.0068 | 11.6023 | 0.0065 | 9.3614 | 0.0116 | 90 | 0 | 108.7445 | 0.0676 | 90 | 0 | 786.455 | 1.597 | 117 | 132 |
| 268 | 7.6499 | 0.0065 | 11.6167 | 0.0065 | 9.3857 | 0.0162 | 90 | 0 | 108.7421 | 0.0644 | 90 | 0 | 789.844 | 1.936 | 123 | 137 |
| 269 | 7.6325 | 0.0077 | 11.5876 | 0.0094 | 9.3268 | 0.0213 | 90 | 0 | 108.7579 | 0.0583 | 90 | 0 | 781.075 | 2.705 | 115 | 123 |
| 270 | 7.6575 | 0.0076 | 11.6246 | 0.0096 | 9.3751 | 0.0201 | 90 | 0 | 108.7448 | 0.0619 | 90 | 0 | 790.258 | 2.556 | 110 | 119 |
| 271 | 7.6721 | 0.008  | 11.6222 | 0.0052 | 9.3404 | 0.0044 | 90 | 0 | 108.7542 | 0.0329 | 90 | 0 | 788.632 | 1.517 | 127 | 139 |
| 272 | 7.6575 | 0.0191 | 11.6431 | 0.01   | 9.3487 | 0.0076 | 90 | 0 | 108.6953 | 0.0656 | 90 | 0 | 789.519 | 3.264 | 125 | 136 |
| 273 | 7.6367 | 0.0138 | 11.62   | 0.0053 | 9.344  | 0.0044 | 90 | 0 | 108.6486 | 0.0349 | 90 | 0 | 785.642 | 1.904 | 129 | 143 |
| 274 | 7.6734 | 0.0088 | 11.6192 | 0.0052 | 9.3471 | 0.0046 | 90 | 0 | 108.6355 | 0.0275 | 90 | 0 | 789.68  | 1.575 | 120 | 134 |
| 275 | 7.6586 | 0.008  | 11.6329 | 0.0048 | 9.3396 | 0.0038 | 90 | 0 | 108.5454 | 0.0285 | 90 | 0 | 788.872 | 1.231 | 127 | 155 |
| 276 | 7.6239 | 0.0057 | 11.5986 | 0.0035 | 9.3176 | 0.0035 | 90 | 0 | 108.6307 | 0.0203 | 90 | 0 | 780.746 | 0.932 | 147 | 188 |
| 277 | 7.6391 | 0.0056 | 11.6221 | 0.0049 | 9.3275 | 0.0051 | 90 | 0 | 108.5899 | 0.0243 | 90 | 0 | 784.907 | 1.14  | 138 | 180 |
| 278 | 7.6458 | 0.0035 | 11.6095 | 0.0038 | 9.3298 | 0.0034 | 90 | 0 | 108.6595 | 0.0175 | 90 | 0 | 784.621 | 0.747 | 138 | 179 |
| 279 | 7.6449 | 0.0042 | 11.5977 | 0.0048 | 9.3216 | 0.0055 | 90 | 0 | 108.6917 | 0.0194 | 90 | 0 | 782.891 | 1.056 | 135 | 181 |
| 280 | 7.6657 | 0.0044 | 11.6332 | 0.0068 | 9.3456 | 0.0064 | 90 | 0 | 108.6773 | 0.0259 | 90 | 0 | 789.527 | 1.164 | 124 | 153 |
| 281 | 7.6371 | 0.0043 | 11.5846 | 0.0082 | 9.3264 | 0.0063 | 90 | 0 | 108.661  | 0.0191 | 90 | 0 | 781.754 | 1.283 | 119 | 135 |
| 282 | 7.663  | 0.0051 | 11.6238 | 0.0098 | 9.3483 | 0.007  | 90 | 0 | 108.6992 | 0.0194 | 90 | 0 | 788.727 | 1.523 | 112 | 122 |
| 283 | 7.6442 | 0.006  | 11.6045 | 0.0094 | 9.3209 | 0.0081 | 90 | 0 | 108.6523 | 0.0257 | 90 | 0 | 783.403 | 1.737 | 118 | 132 |
| 284 | 7.6425 | 0.0066 | 11.5902 | 0.0099 | 9.3246 | 0.0087 | 90 | 0 | 108.7002 | 0.0317 | 90 | 0 | 782.355 | 1.944 | 116 | 129 |
| 285 | 7.661  | 0.0072 | 11.6197 | 0.0118 | 9.3484 | 0.0094 | 90 | 0 | 108.6013 | 0.045  | 90 | 0 | 788.709 | 2.105 | 112 | 124 |
| 286 | 7.653  | 0.01   | 11.5874 | 0.016  | 9.3432 | 0.0114 | 90 | 0 | 108.4786 | 0.0854 | 90 | 0 | 785.824 | 2.759 | 109 | 123 |
| 287 | 7.6573 | 0.0118 | 11.593  | 0.0143 | 9.3052 | 0.0119 | 90 | 0 | 108.6969 | 0.1058 | 90 | 0 | 782.437 | 2.951 | 107 | 120 |
| 288 | 7.65   | 0.0103 | 11.6164 | 0.0115 | 9.3263 | 0.0102 | 90 | 0 | 108.7815 | 0.0902 | 90 | 0 | 784.65  | 2.526 | 108 | 119 |
| 289 | 7.6484 | 0.0075 | 11.6187 | 0.0046 | 9.3707 | 0.0104 | 90 | 0 | 108.8343 | 0.0695 | 90 | 0 | 788.141 | 1.497 | 136 | 156 |
| 290 | 7.653  | 0.01   | 11.6134 | 0.0061 | 9.3885 | 0.0221 | 90 | 0 | 109.0236 | 0.1178 | 90 | 0 | 788.858 | 2.467 | 128 | 142 |

# COMMUNICATION

---

|     |        |        |         |        |        |        |    |   |          |        |    |   |         |       |     |     |
|-----|--------|--------|---------|--------|--------|--------|----|---|----------|--------|----|---|---------|-------|-----|-----|
| 291 | 7.6333 | 0.0072 | 11.6084 | 0.0059 | 9.3182 | 0.0151 | 90 | 0 | 108.6122 | 0.0707 | 90 | 0 | 782.505 | 1.924 | 130 | 155 |
| 292 | 7.6404 | 0.0048 | 11.6192 | 0.0052 | 9.3027 | 0.0098 | 90 | 0 | 108.6622 | 0.0393 | 90 | 0 | 782.435 | 1.392 | 137 | 174 |
| 293 | 7.6378 | 0.0043 | 11.6099 | 0.0046 | 9.3142 | 0.0078 | 90 | 0 | 108.7099 | 0.0258 | 90 | 0 | 782.288 | 1.209 | 146 | 190 |
| 294 | 7.6725 | 0.0044 | 11.6397 | 0.0054 | 9.3788 | 0.0084 | 90 | 0 | 108.8056 | 0.0218 | 90 | 0 | 792.866 | 1.306 | 136 | 173 |
| 295 | 7.6408 | 0.0049 | 11.6047 | 0.0072 | 9.312  | 0.0082 | 90 | 0 | 108.6669 | 0.019  | 90 | 0 | 782.247 | 1.422 | 134 | 164 |
| 296 | 7.6463 | 0.0037 | 11.622  | 0.0066 | 9.3326 | 0.0055 | 90 | 0 | 108.7945 | 0.0121 | 90 | 0 | 785.119 | 1.084 | 139 | 171 |
| 297 | 7.6573 | 0.0096 | 11.6408 | 0.0241 | 9.3532 | 0.0143 | 90 | 0 | 108.7394 | 0.0375 | 90 | 0 | 789.512 | 2.973 | 132 | 159 |
| 298 | 7.655  | 0.0044 | 11.6039 | 0.0152 | 9.3439 | 0.006  | 90 | 0 | 108.8208 | 0.0191 | 90 | 0 | 785.621 | 1.503 | 120 | 136 |
| 299 | 7.66   | 0.0042 | 11.6437 | 0.0118 | 9.3659 | 0.0052 | 90 | 0 | 108.7875 | 0.0144 | 90 | 0 | 790.852 | 1.432 | 129 | 154 |
| 300 | 7.6304 | 0.0047 | 11.5853 | 0.0123 | 9.3215 | 0.0056 | 90 | 0 | 108.7294 | 0.0143 | 90 | 0 | 780.384 | 1.521 | 130 | 146 |
| 301 | 7.6579 | 0.003  | 11.6107 | 0.0091 | 9.3448 | 0.0041 | 90 | 0 | 108.8052 | 0.0107 | 90 | 0 | 786.521 | 1.116 | 125 | 145 |
| 302 | 7.654  | 0.004  | 11.6179 | 0.0092 | 9.352  | 0.0046 | 90 | 0 | 108.8143 | 0.0147 | 90 | 0 | 787.178 | 1.238 | 126 | 142 |
| 303 | 7.646  | 0.004  | 11.6034 | 0.0079 | 9.3451 | 0.0042 | 90 | 0 | 108.8206 | 0.0204 | 90 | 0 | 784.762 | 1.106 | 119 | 136 |
| 304 | 7.6432 | 0.0059 | 11.6186 | 0.01   | 9.3337 | 0.0064 | 90 | 0 | 108.7517 | 0.0388 | 90 | 0 | 784.864 | 1.507 | 120 | 133 |
| 305 | 7.6588 | 0.0051 | 11.6239 | 0.0047 | 9.364  | 0.0049 | 90 | 0 | 108.9053 | 0.0327 | 90 | 0 | 788.664 | 0.988 | 133 | 158 |
| 306 | 7.6616 | 0.0085 | 11.6461 | 0.007  | 9.3759 | 0.0094 | 90 | 0 | 108.7968 | 0.0843 | 90 | 0 | 791.975 | 1.436 | 125 | 145 |
| 307 | 7.6663 | 0.0073 | 11.6416 | 0.0085 | 9.362  | 0.0132 | 90 | 0 | 108.505  | 0.0778 | 90 | 0 | 792.344 | 2.553 | 120 | 135 |
| 308 | 7.653  | 0.0063 | 11.6331 | 0.0084 | 9.3528 | 0.0102 | 90 | 0 | 108.5783 | 0.0605 | 90 | 0 | 789.274 | 2.094 | 130 | 152 |
| 309 | 7.6563 | 0.0065 | 11.6454 | 0.0079 | 9.3504 | 0.0091 | 90 | 0 | 108.7513 | 0.0487 | 90 | 0 | 789.434 | 1.944 | 133 | 154 |
| 310 | 7.6402 | 0.0047 | 11.608  | 0.0056 | 9.3296 | 0.006  | 90 | 0 | 108.699  | 0.0324 | 90 | 0 | 783.742 | 1.295 | 139 | 187 |
